# Supplementary material for: Phenotypic and Molecular-Phylogenetic Analyses Reveal Distinct Features of Crown Gall-Associated Xanthomonas Strains
Source: PubMed Central journal article supplement (PMC8809331; doi:10.1128/spectrum.00577-21), 2022-02-02
Supplement: spectrum00577-21_supp_1_seq7.pdf [file spectrum00577-21_supp_1_seq7.pdf]

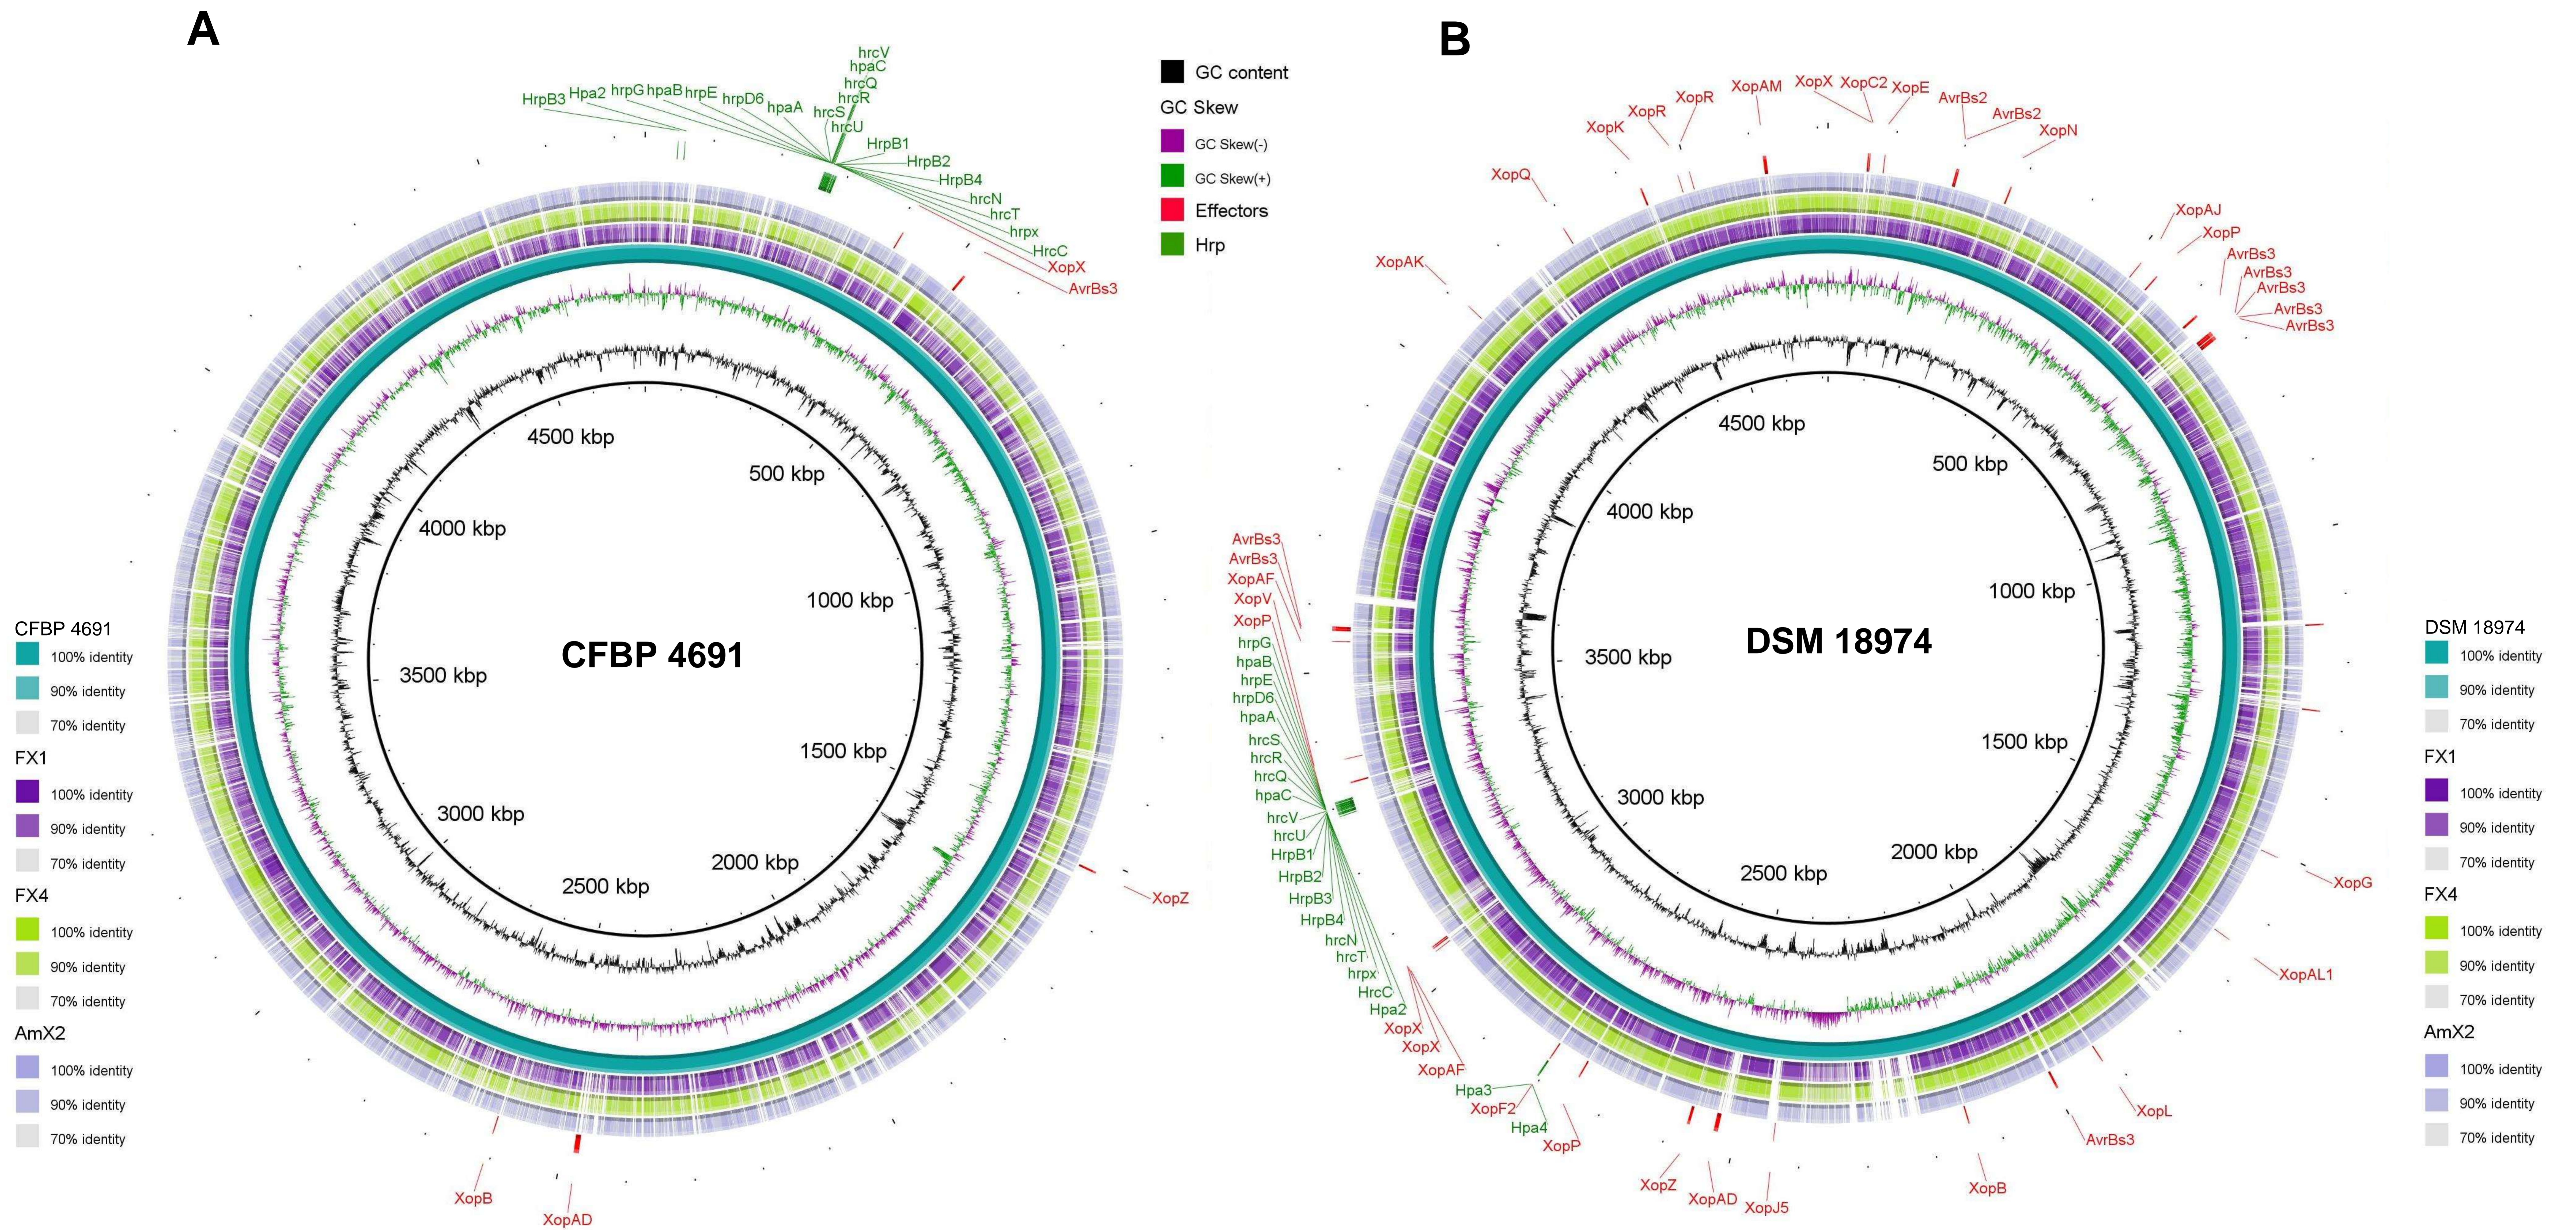

Figure S1: Pairwise genome collinearity alignment of the *Xanthomonas* strains sequenced in this study performed using BRIG 0.95. The genomes of *X. theicola* CFBP 4691 (A) and *X. translucens* pv. *translucens* DSM 18974 (B) were used as reference for the three strains FX1, FX4, and AmX2. Circular mapping against the reference genomes confirmed the absence of a large portion of the T3SS and Xops in the three sequences obtained in this study.

Figure S2:  
Visualization of  
genomic islands in  
the whole genome  
sequences of the  
three *Xanthomonas*  
strains sequenced  
in this study against  
the genomes of two  
reference strains *X.*  
*theicola* CFBP  
4691 and *X.*  
*translucens* pv.  
*translucens* DSM  
18974.

***Xanthomonas theicola* CFBP 4691**

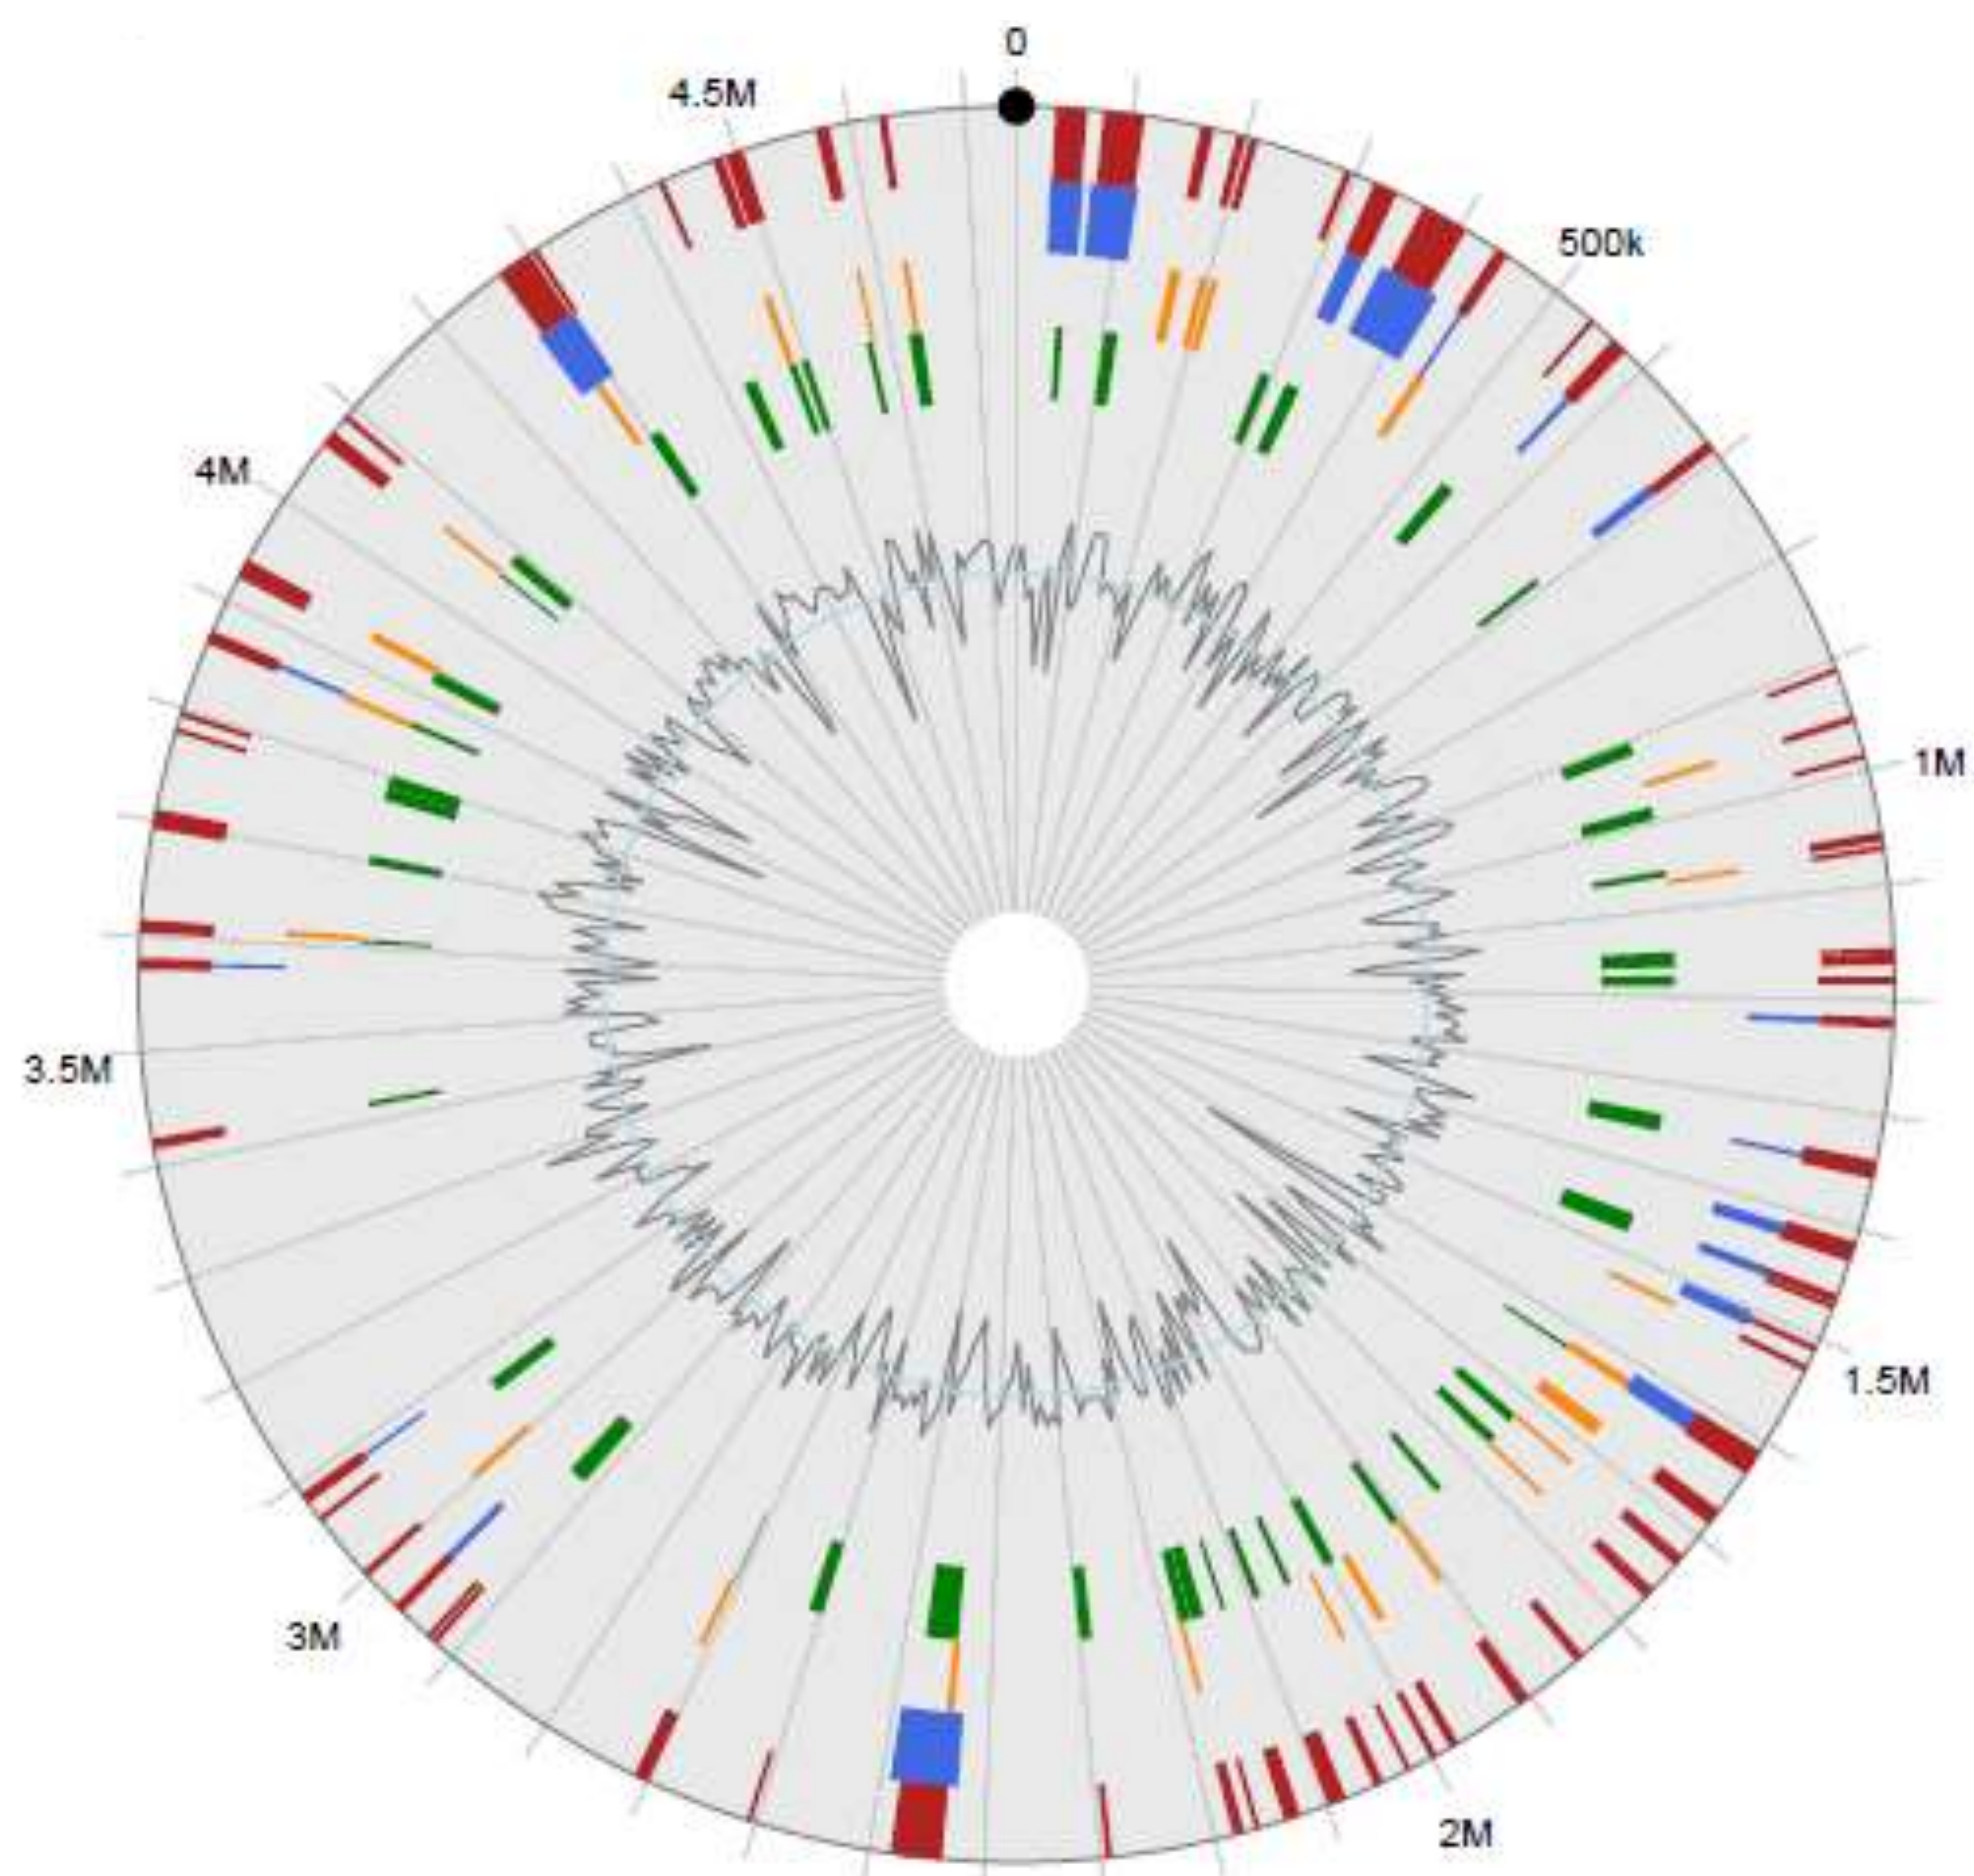

***X. translucens* pv. *translucens* DSM 18974**

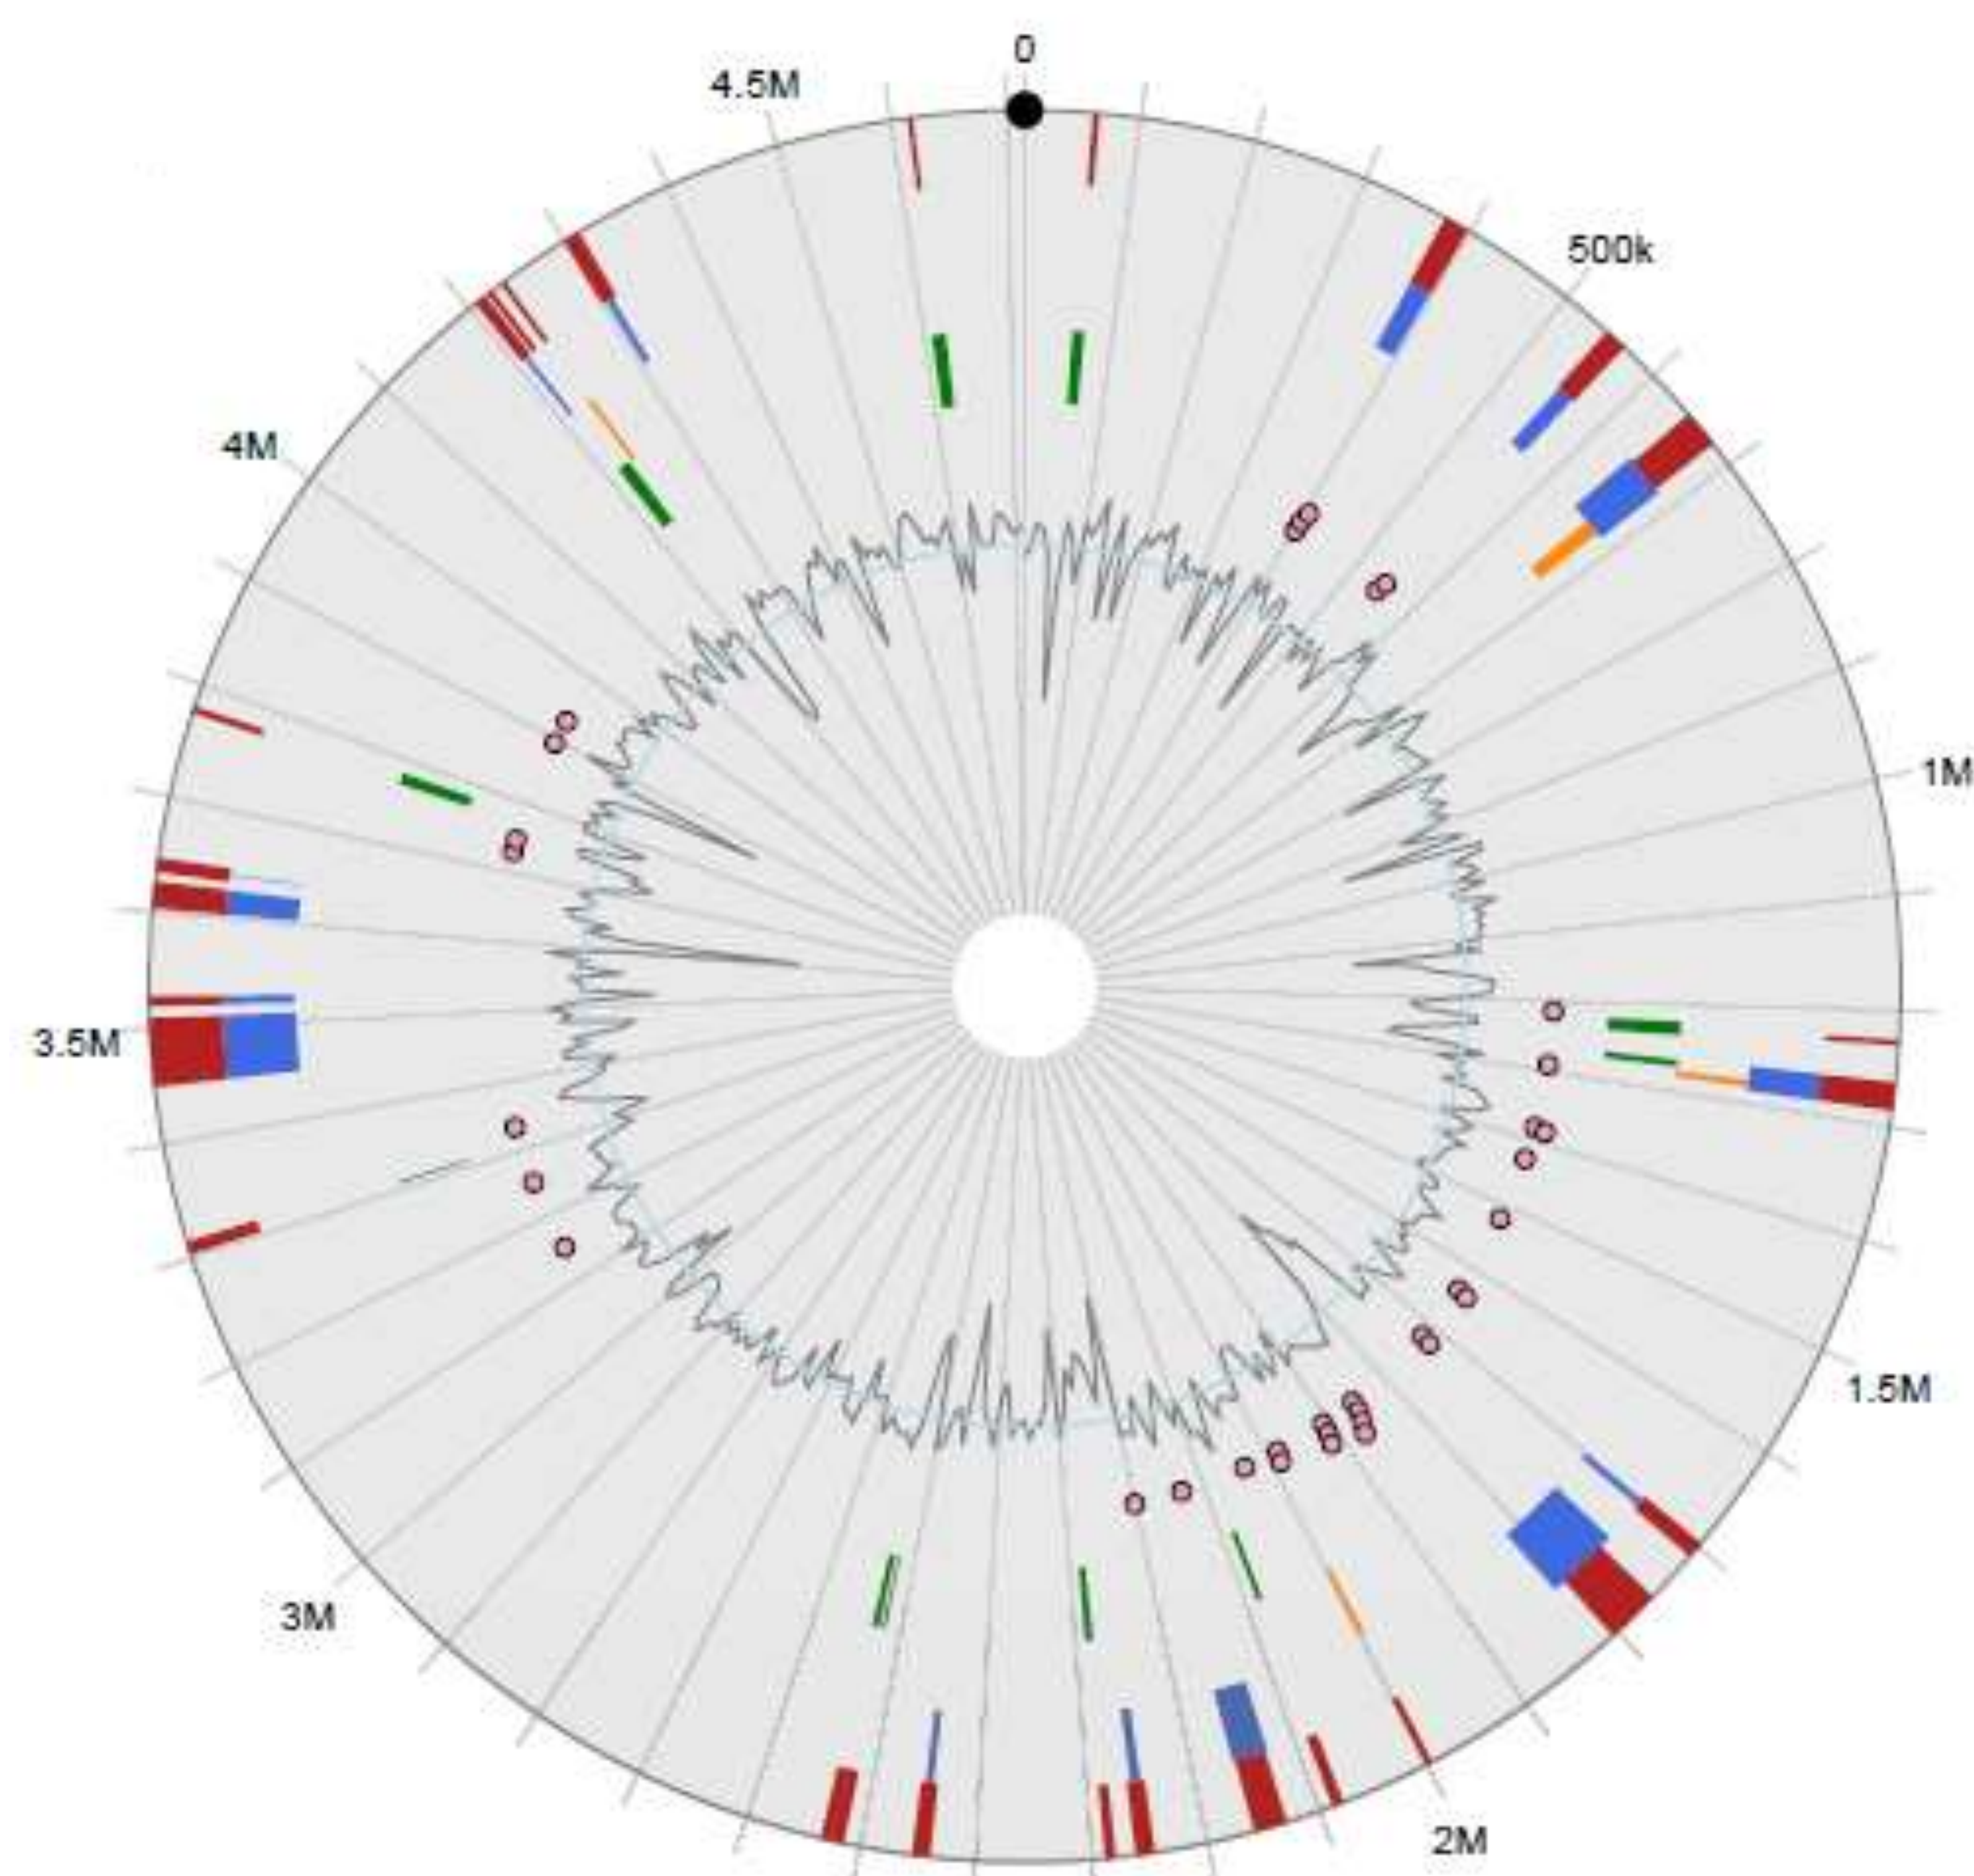

**FX1 vs. CFBP 4691**

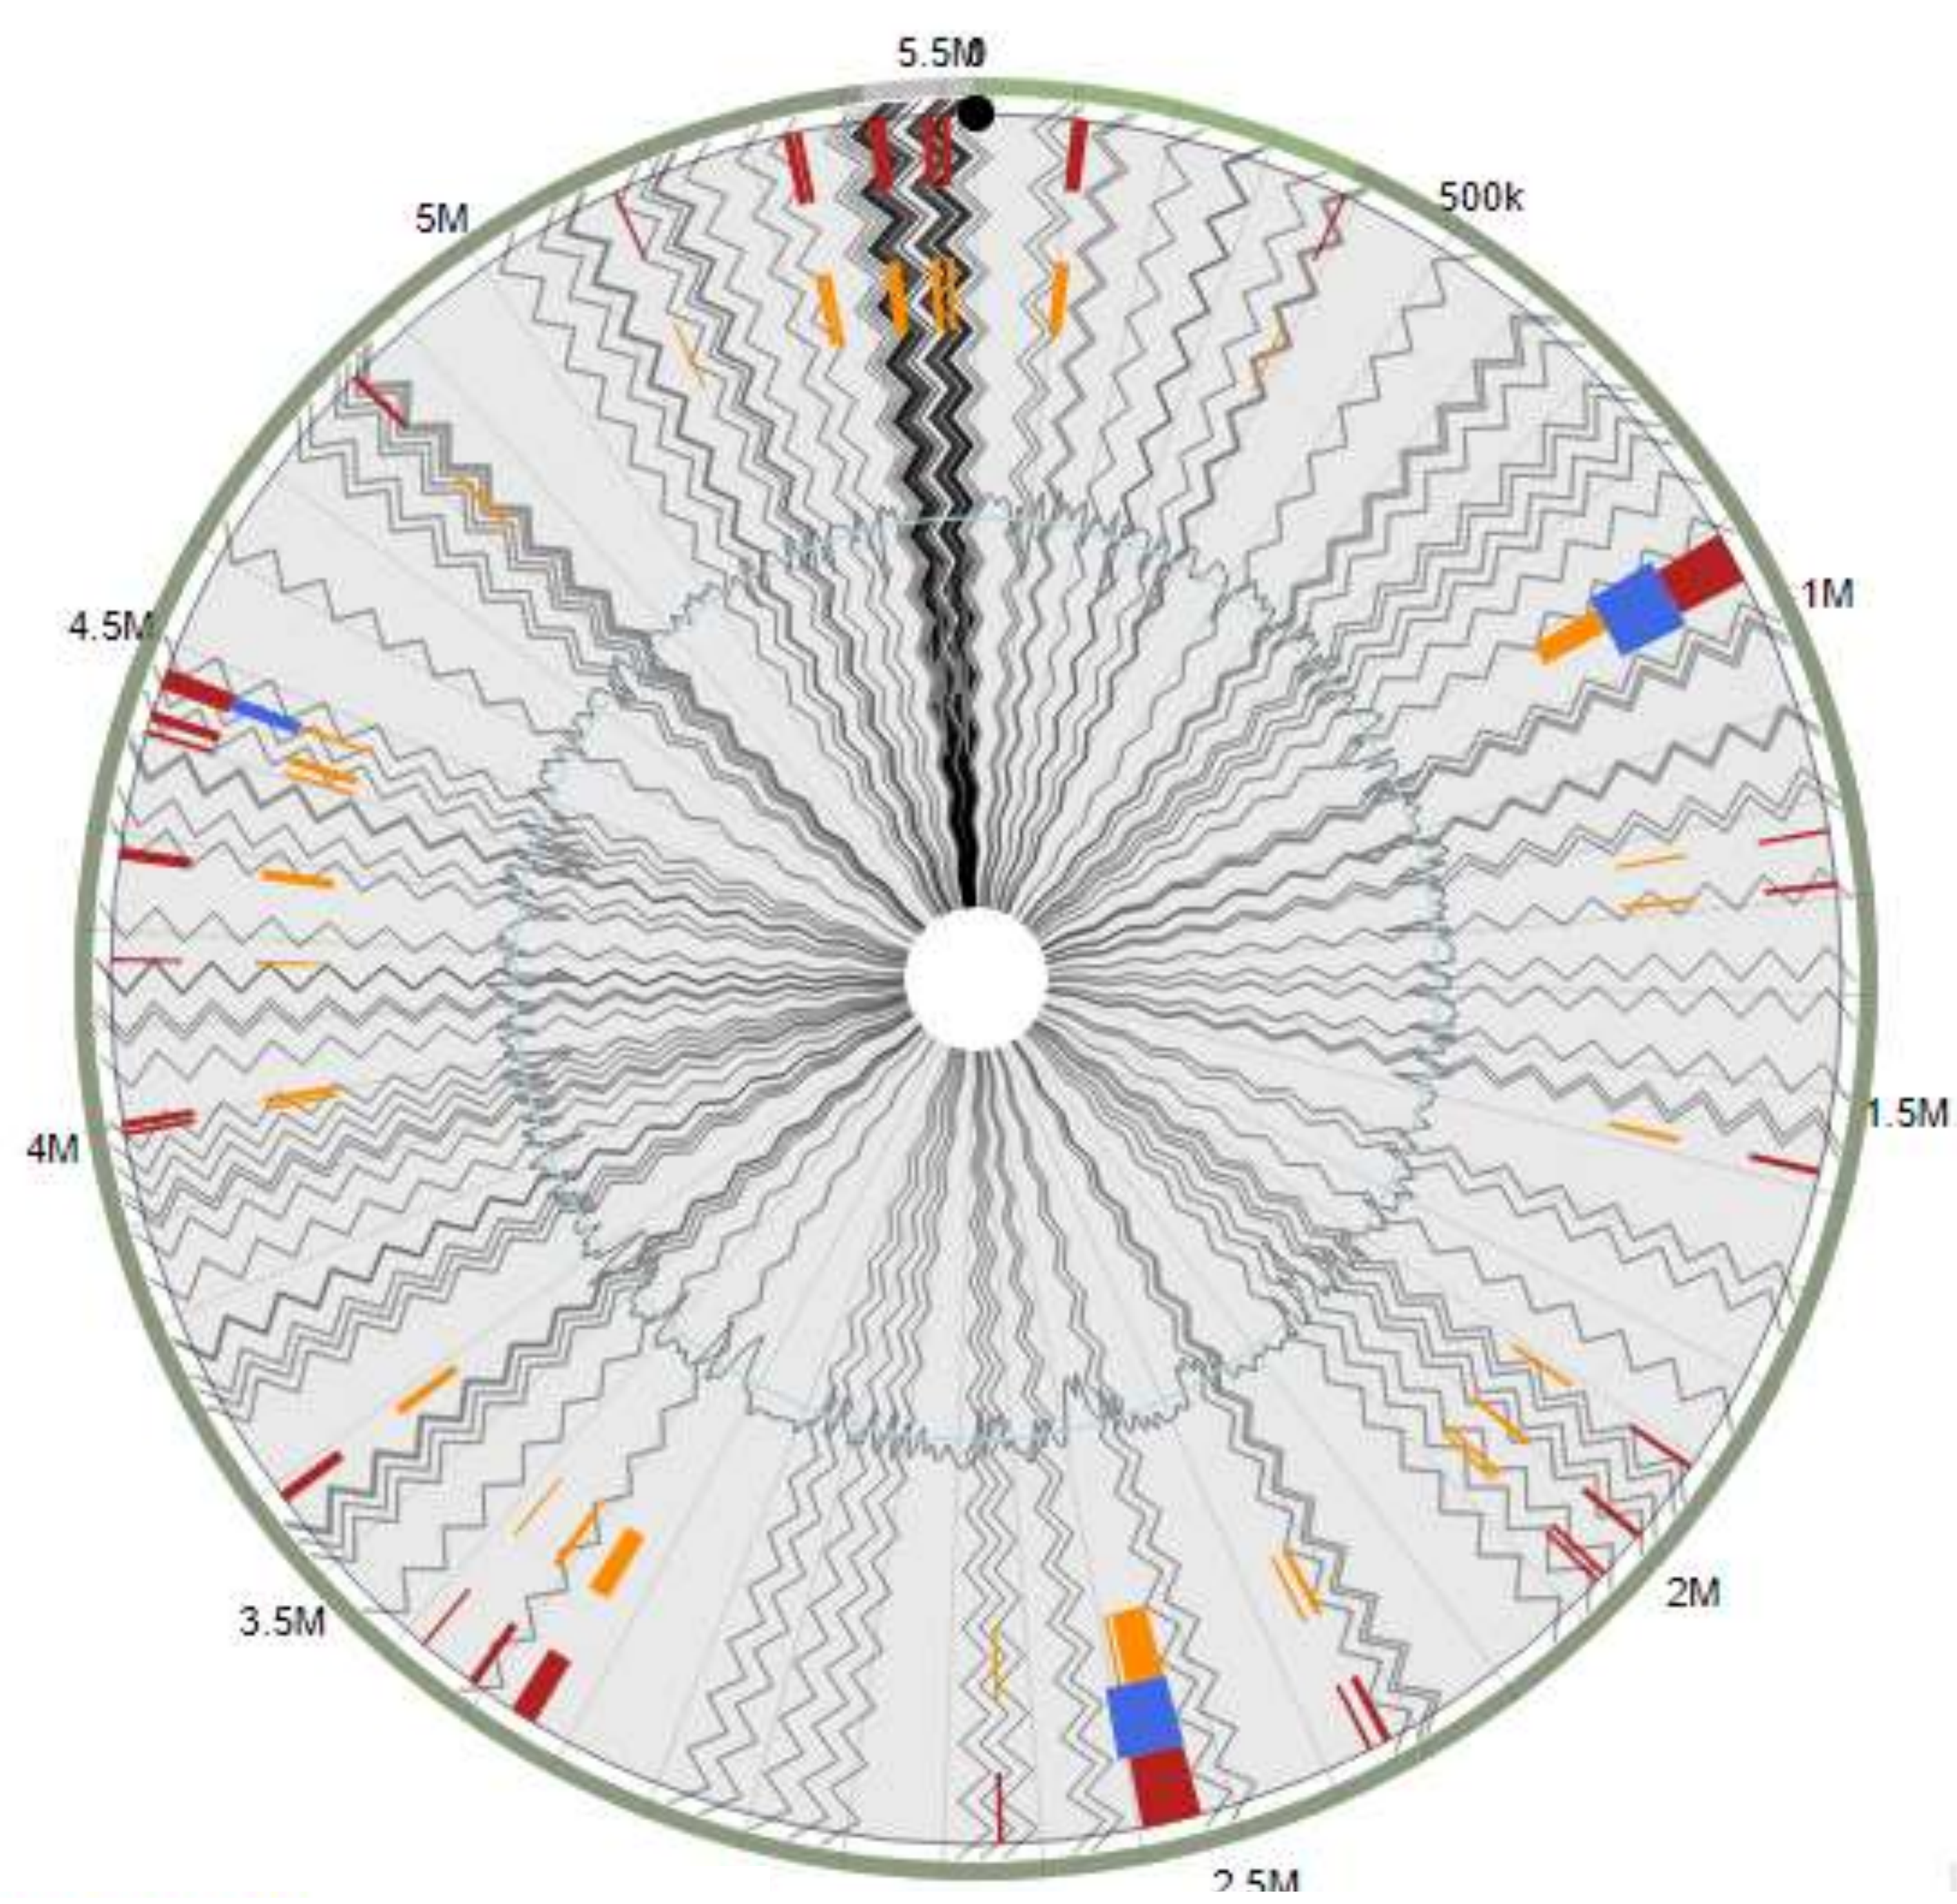

**FX4 vs. CFBP 4691**

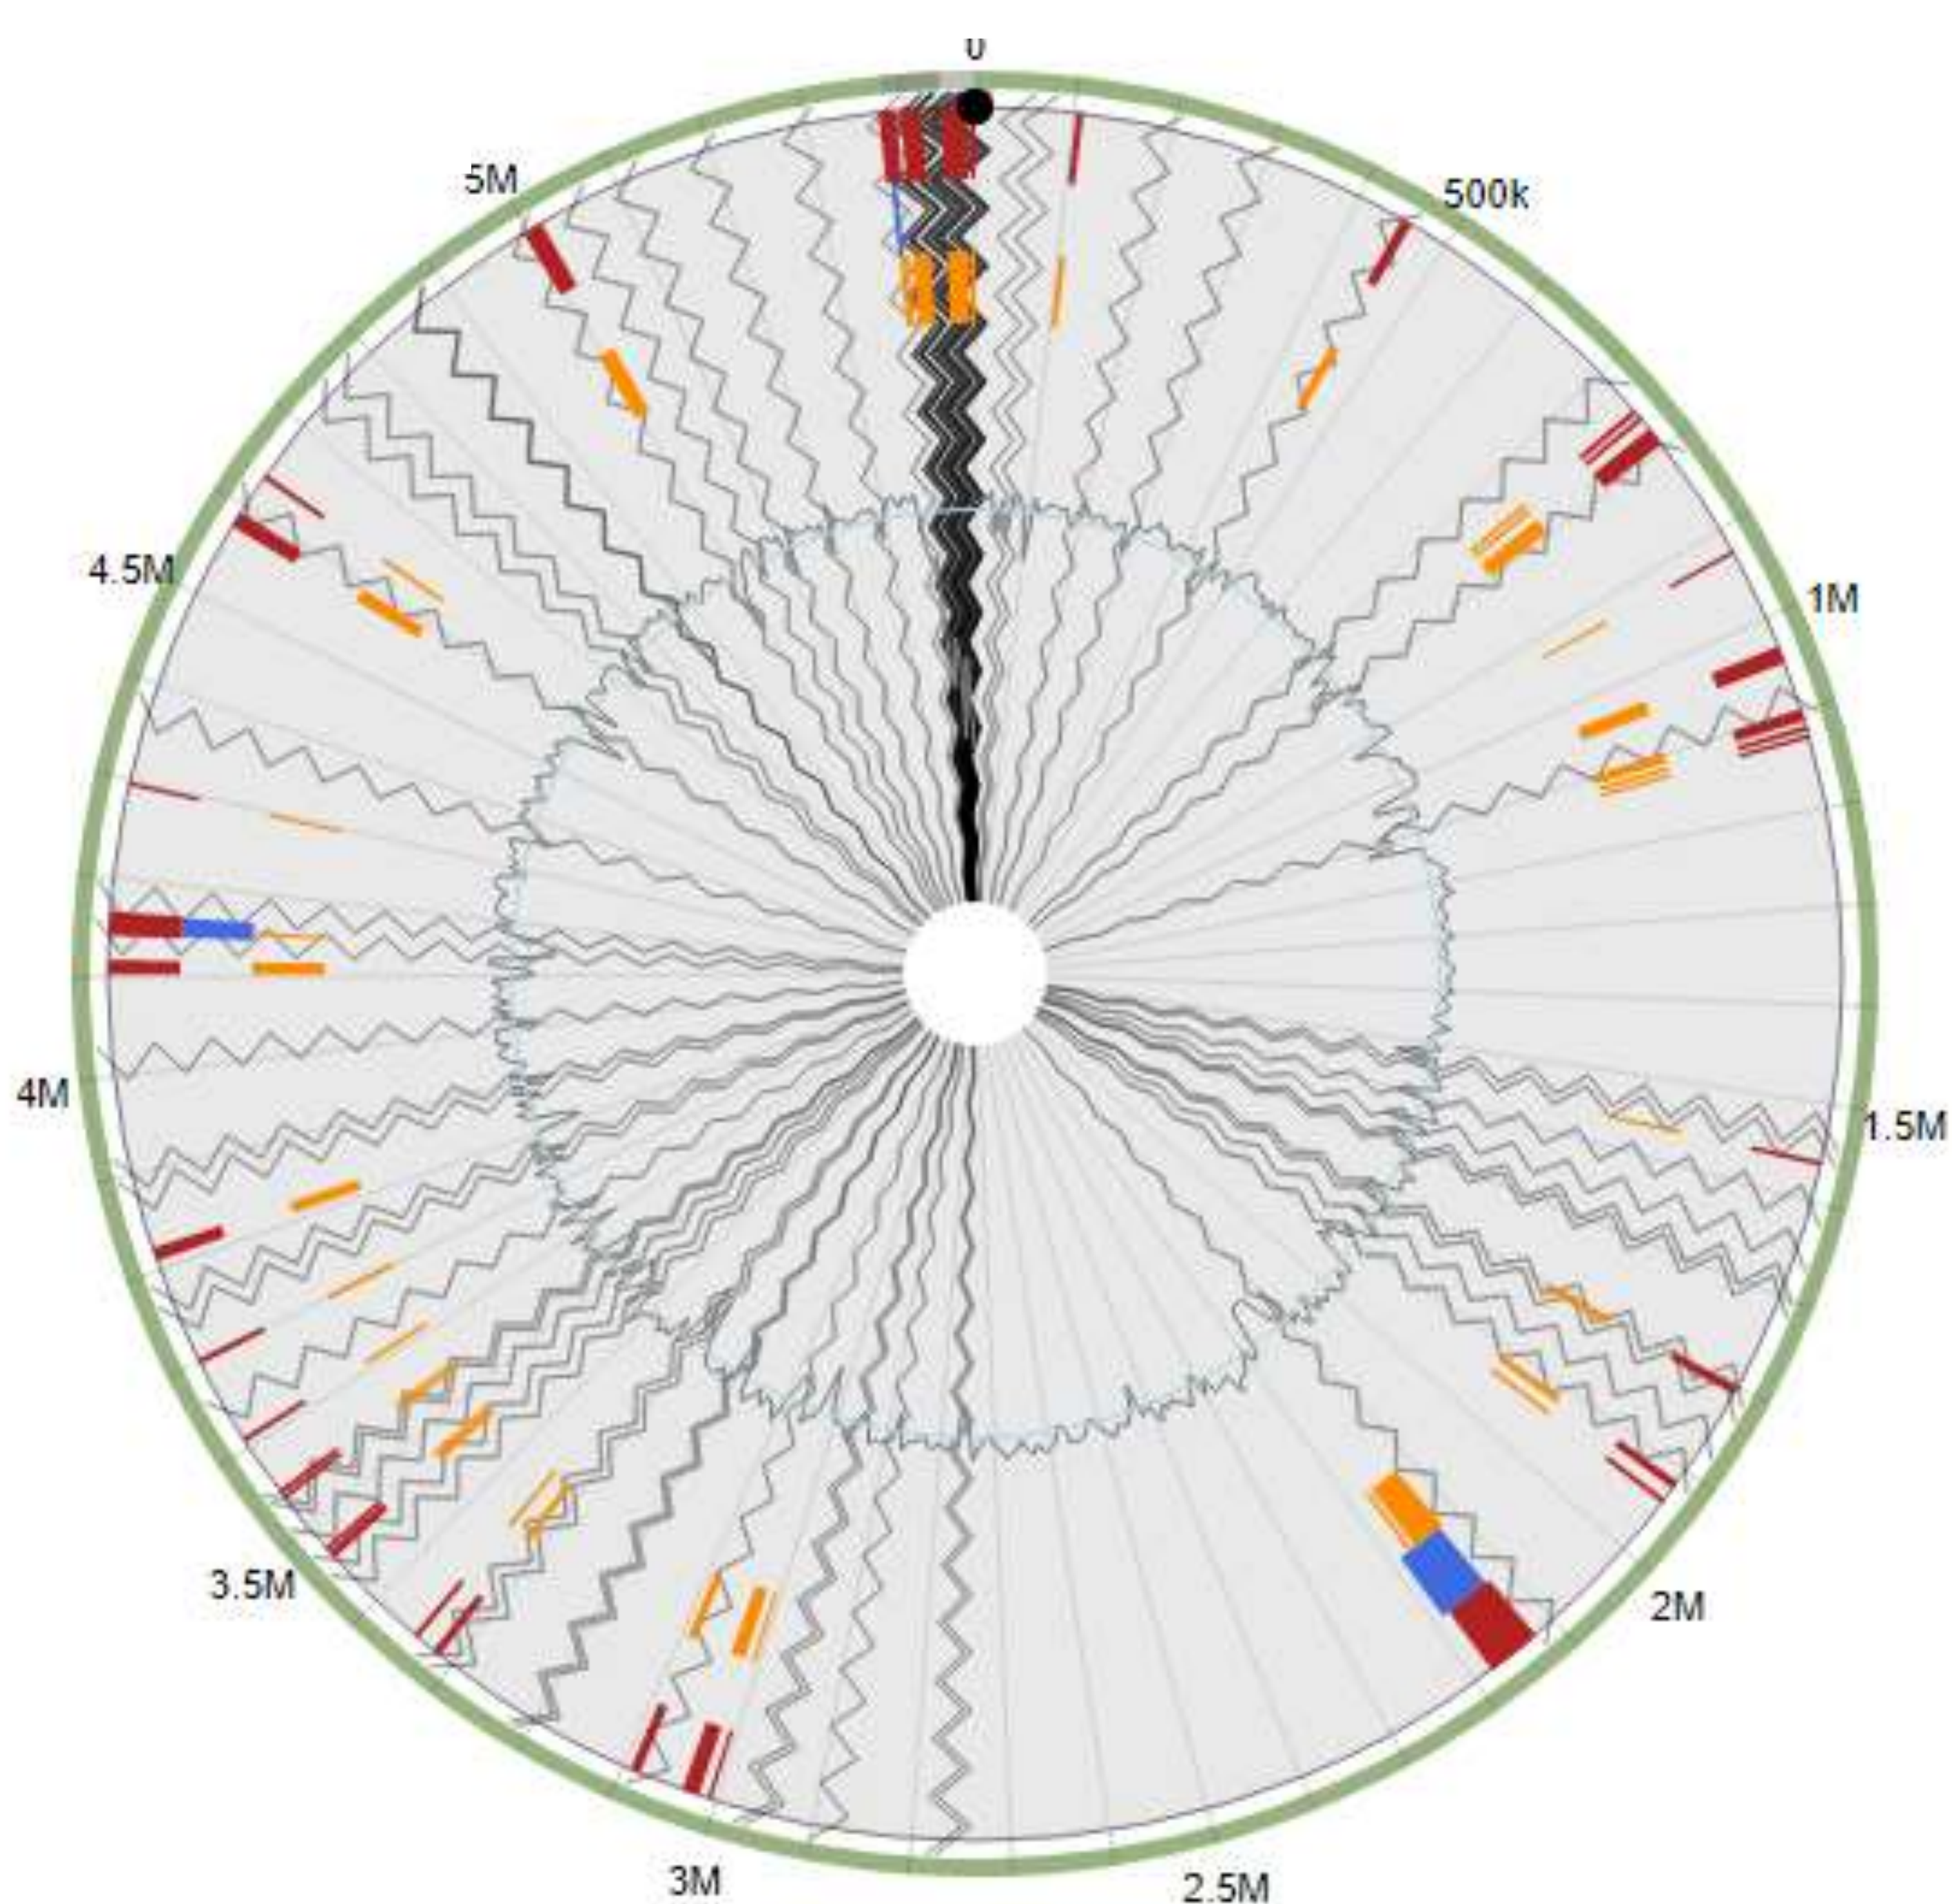

**AmX2 vs. CFBP 4691**

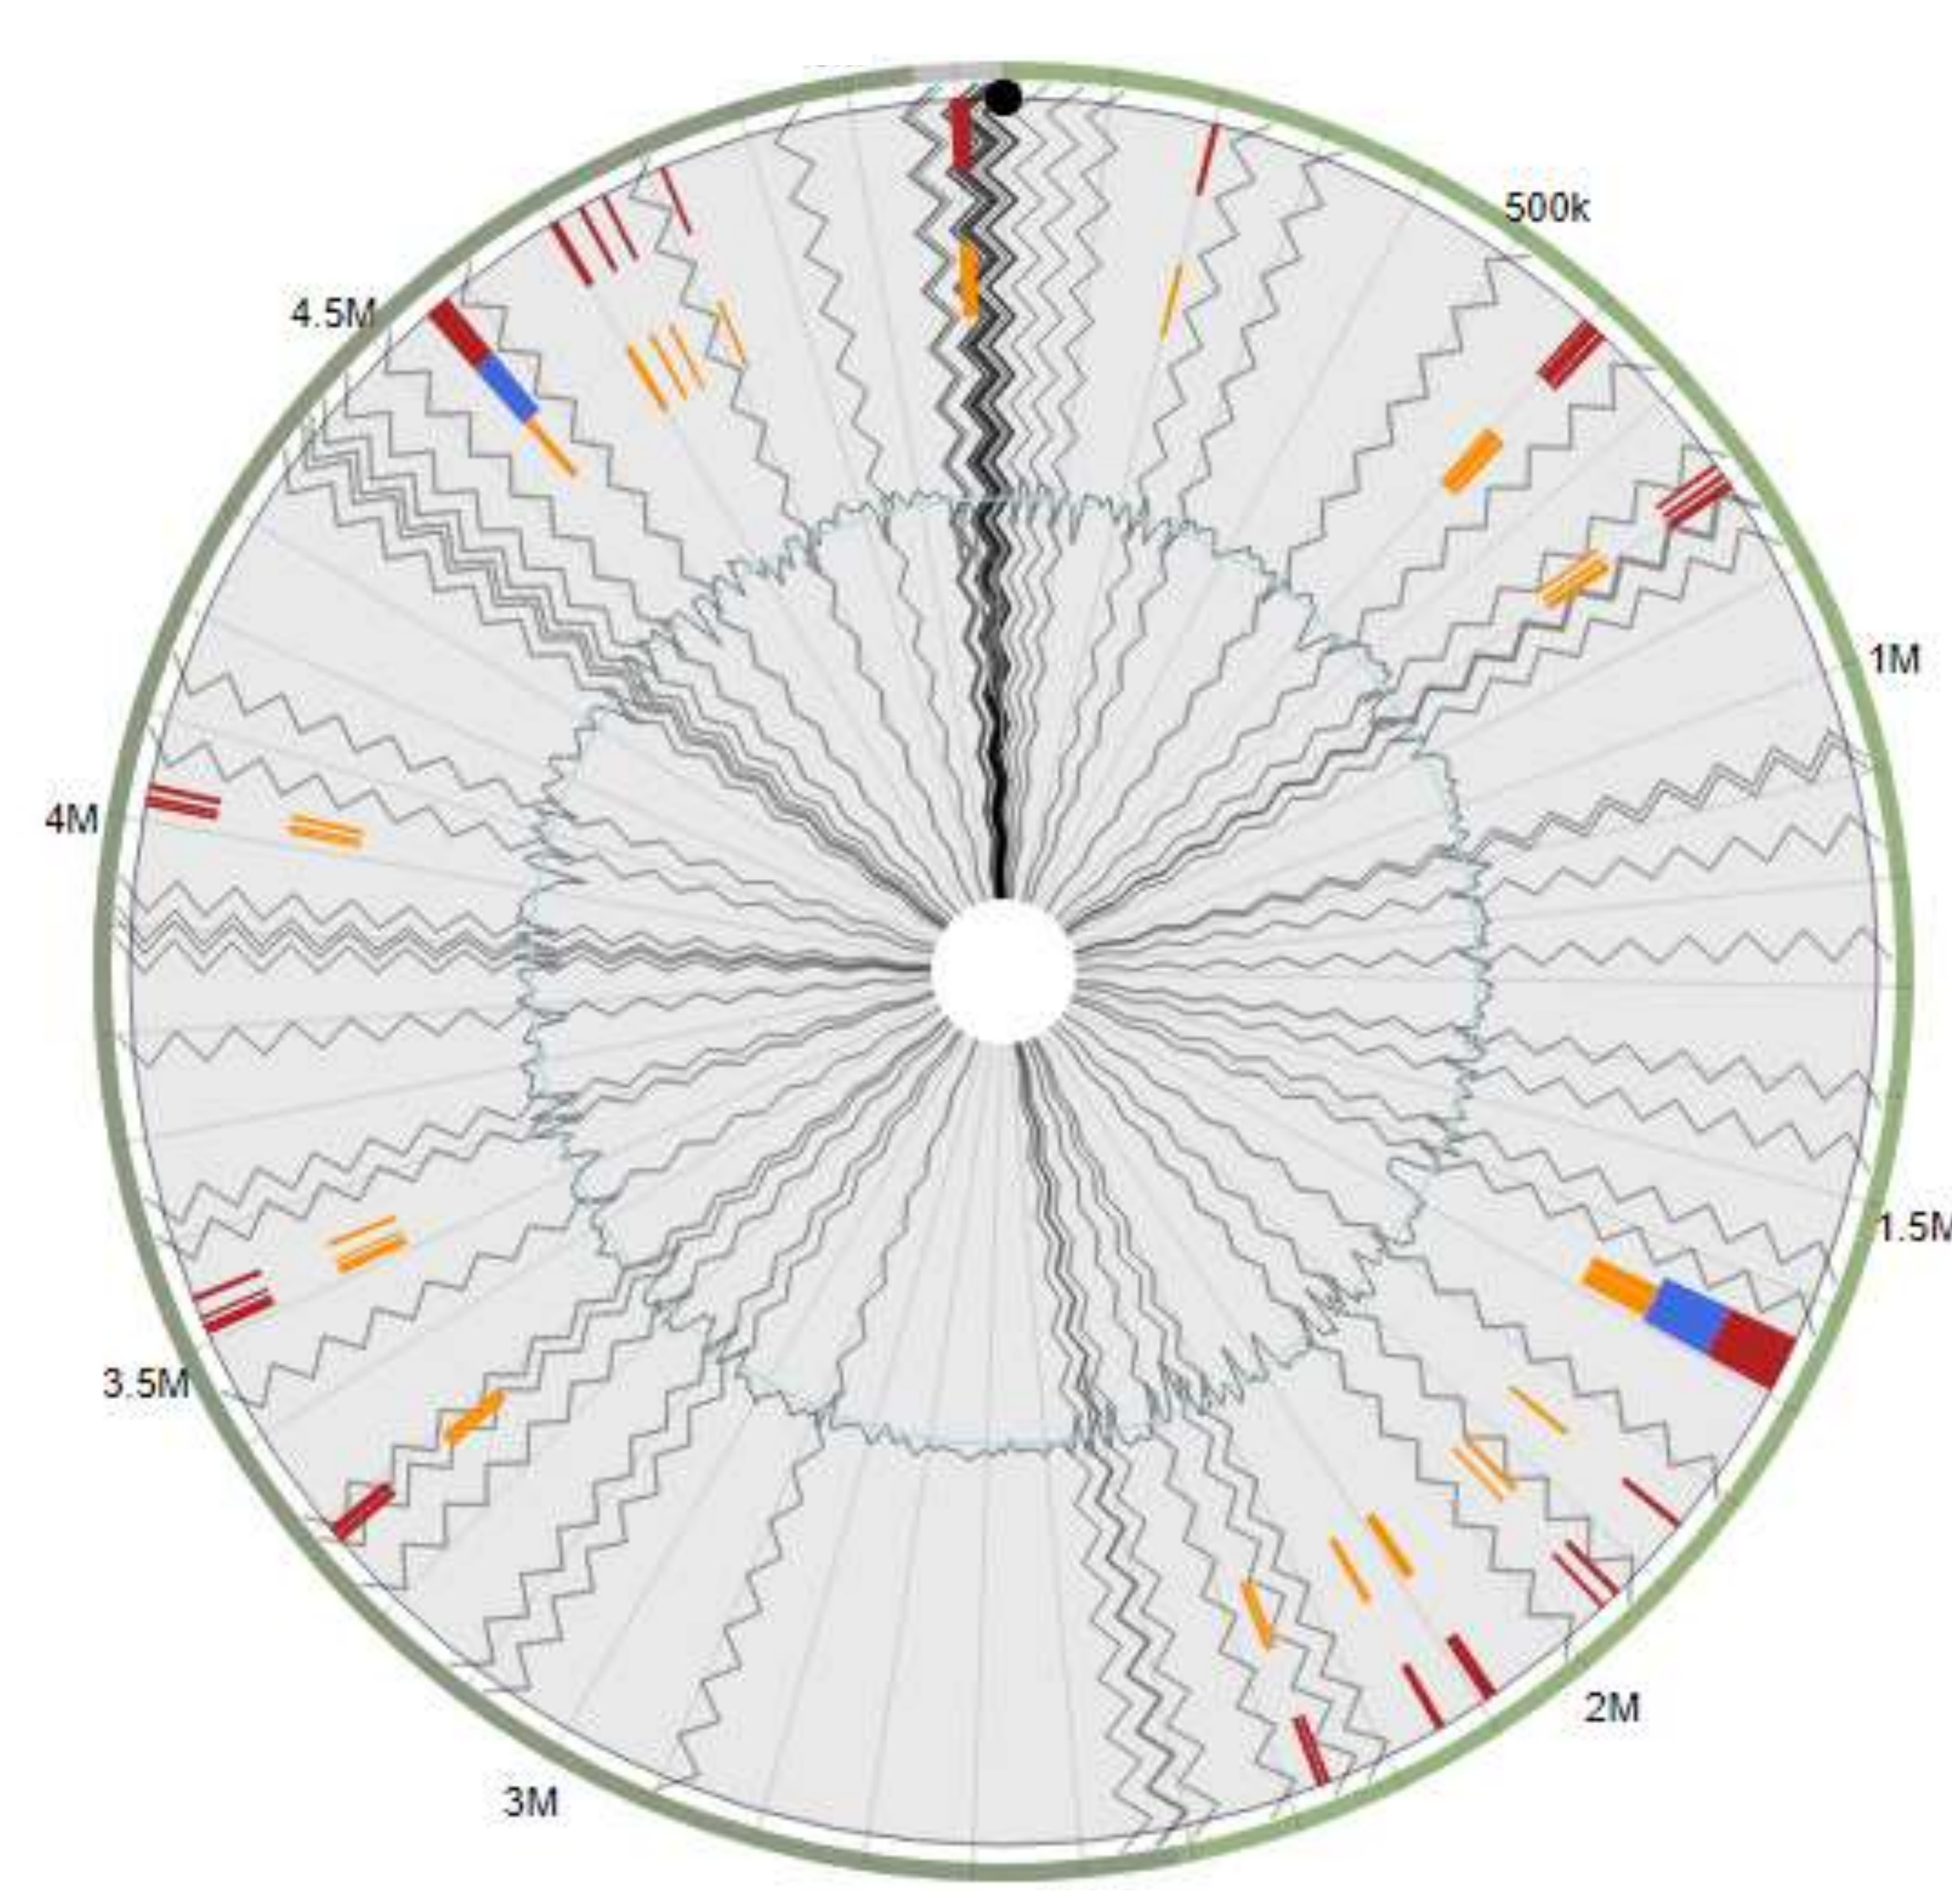

**FX1 vs. DSM 18974**

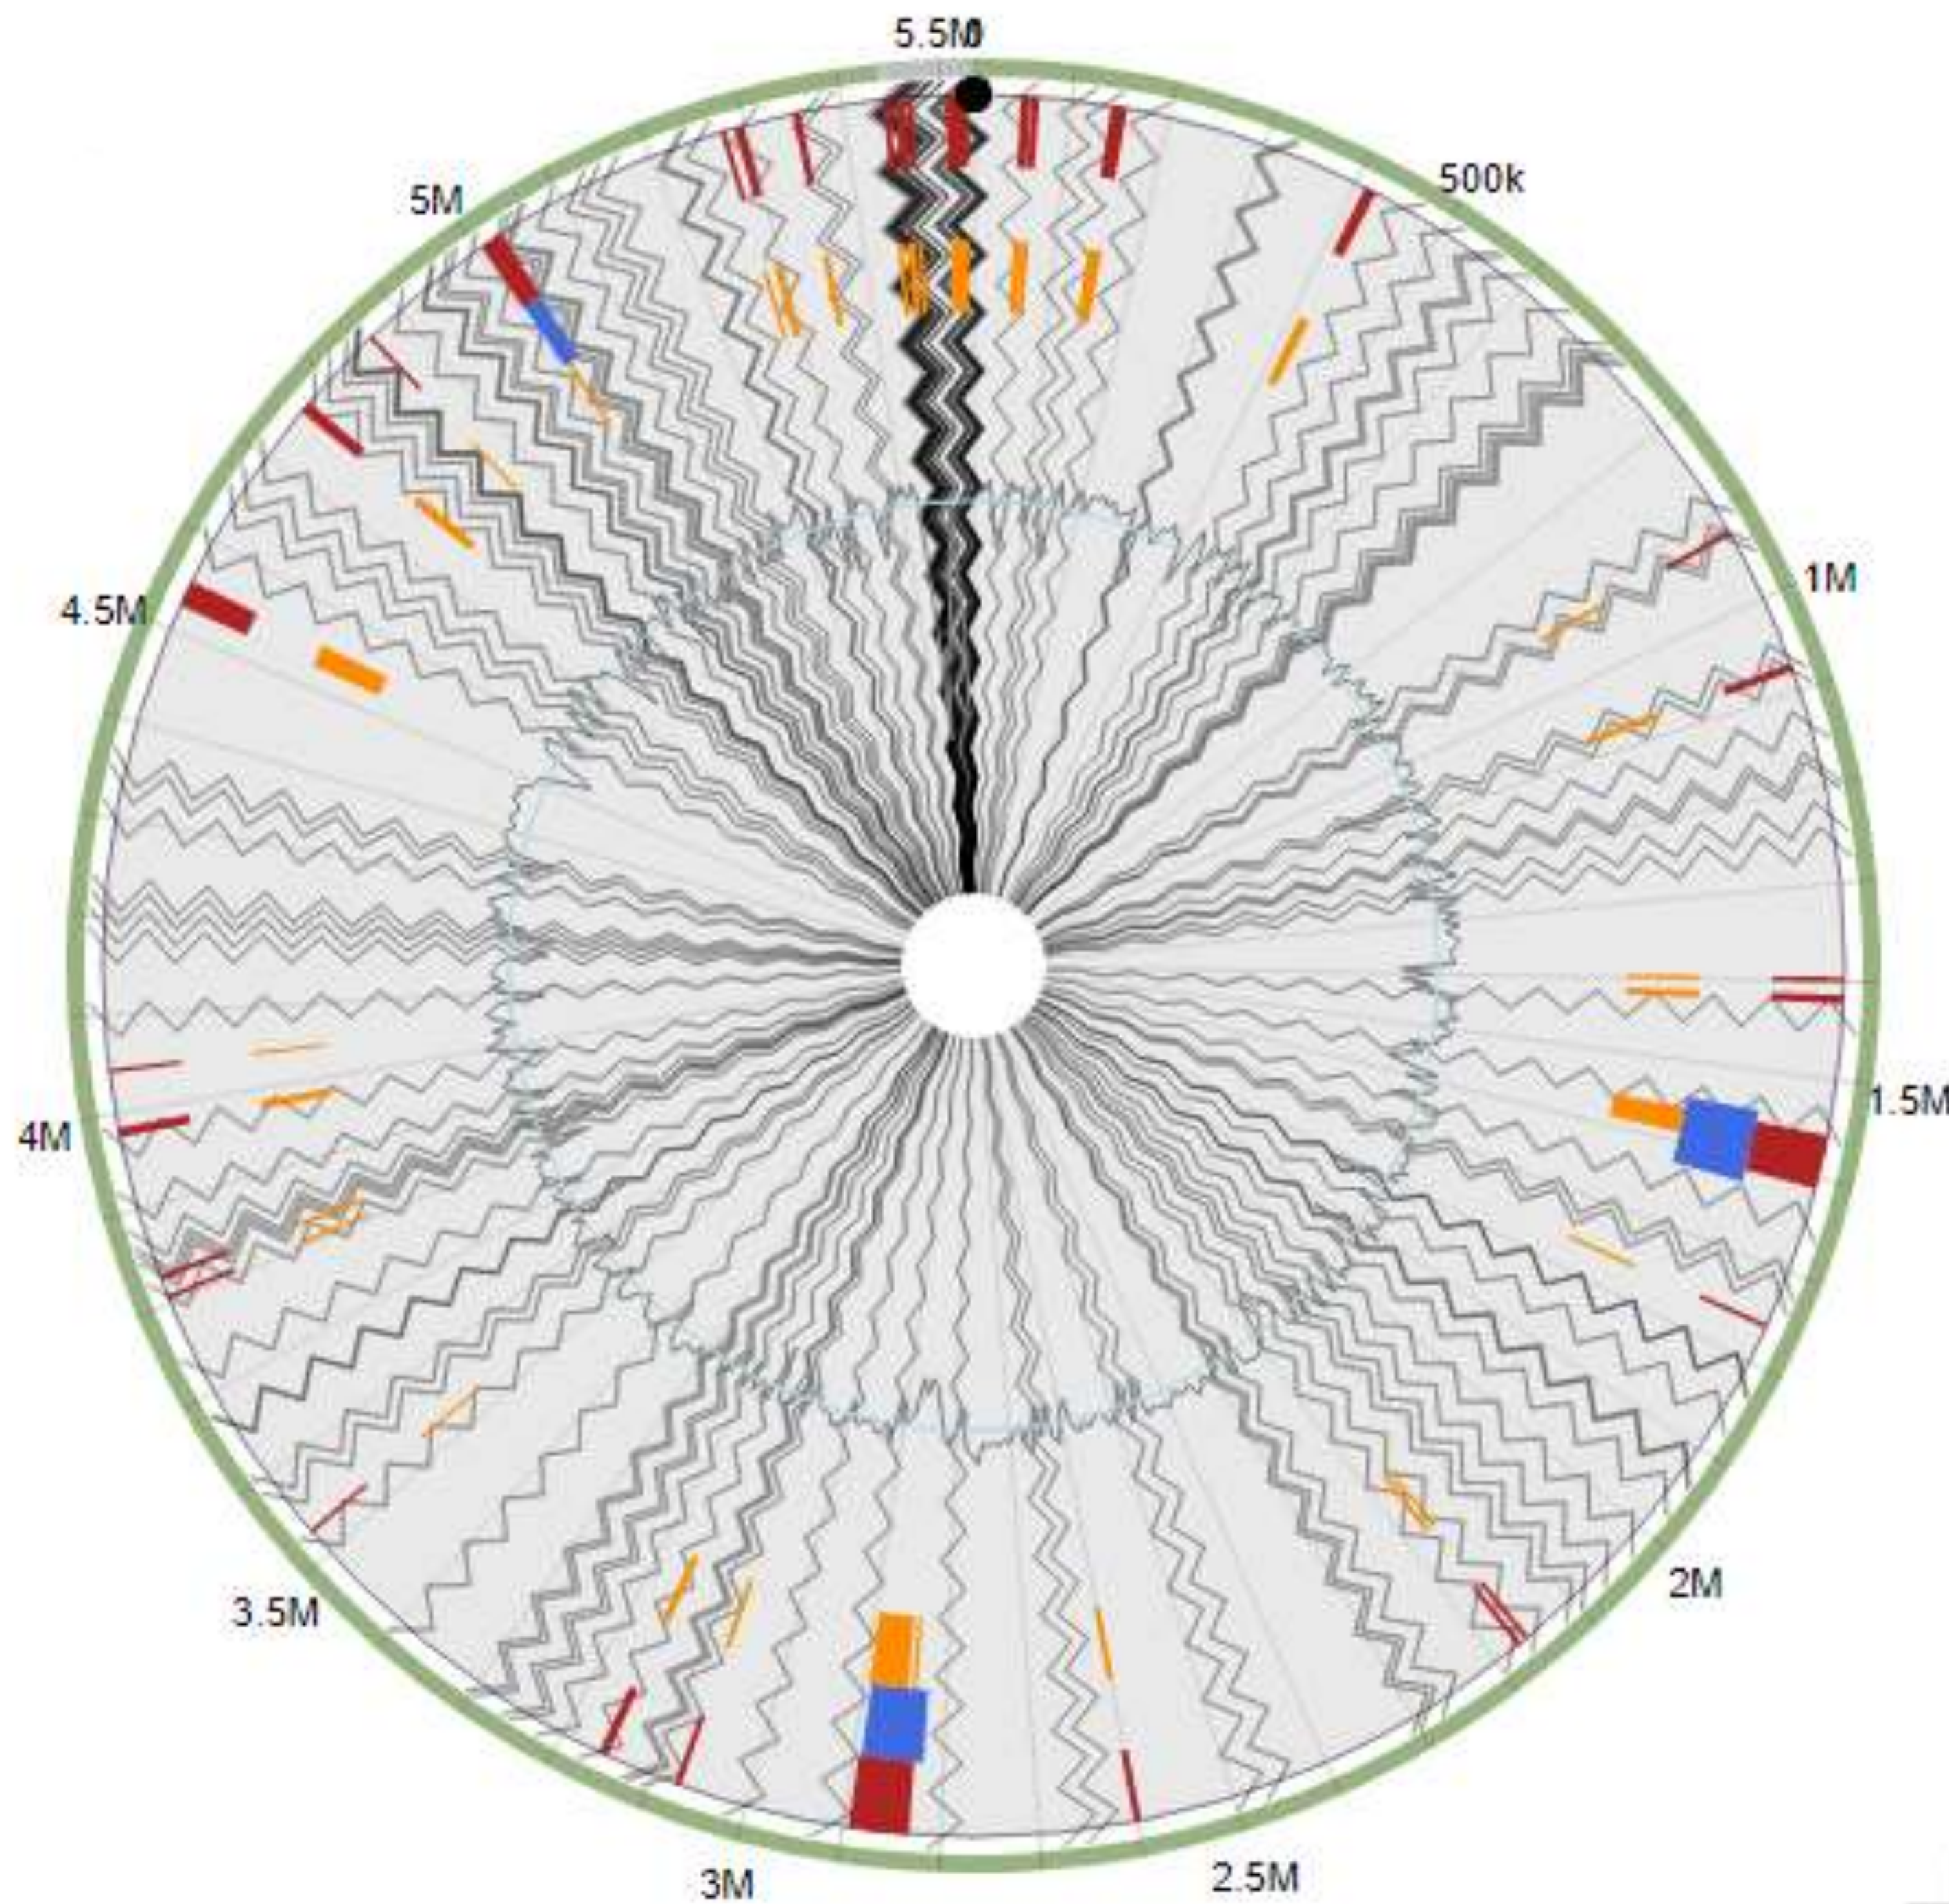

**FX4 vs. DSM 18974**

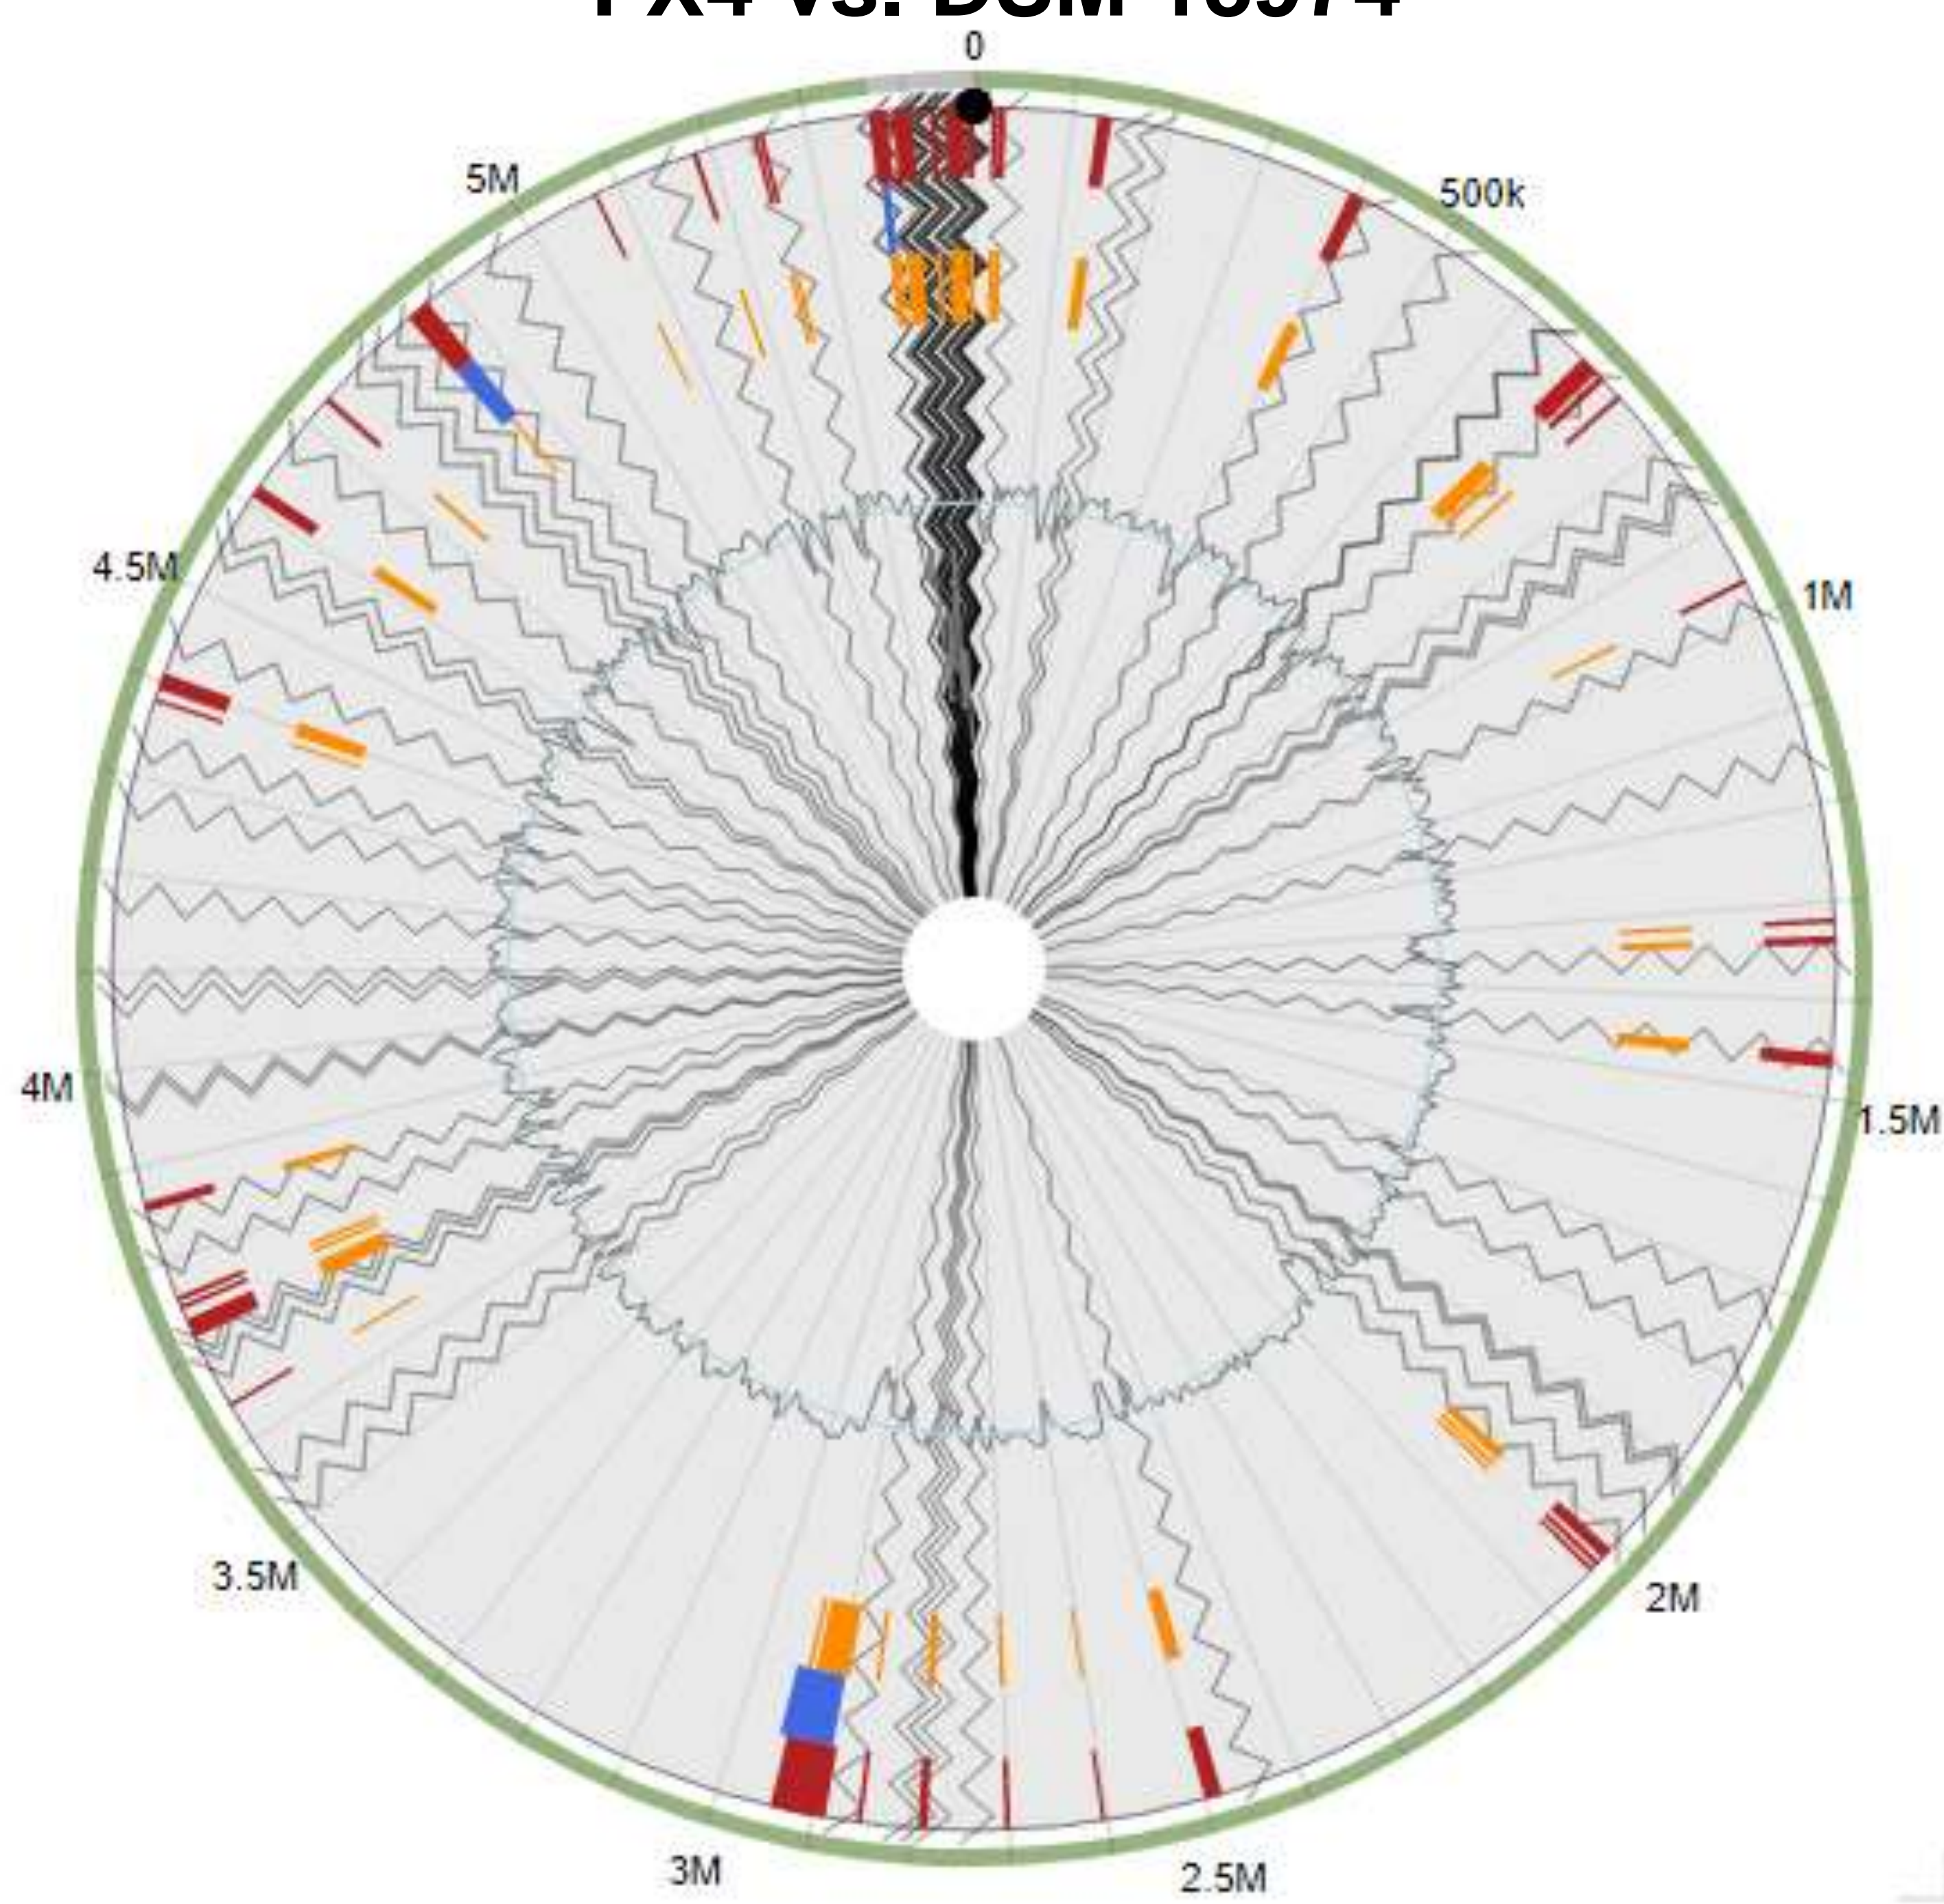

**AmX2 vs. DSM 18974**

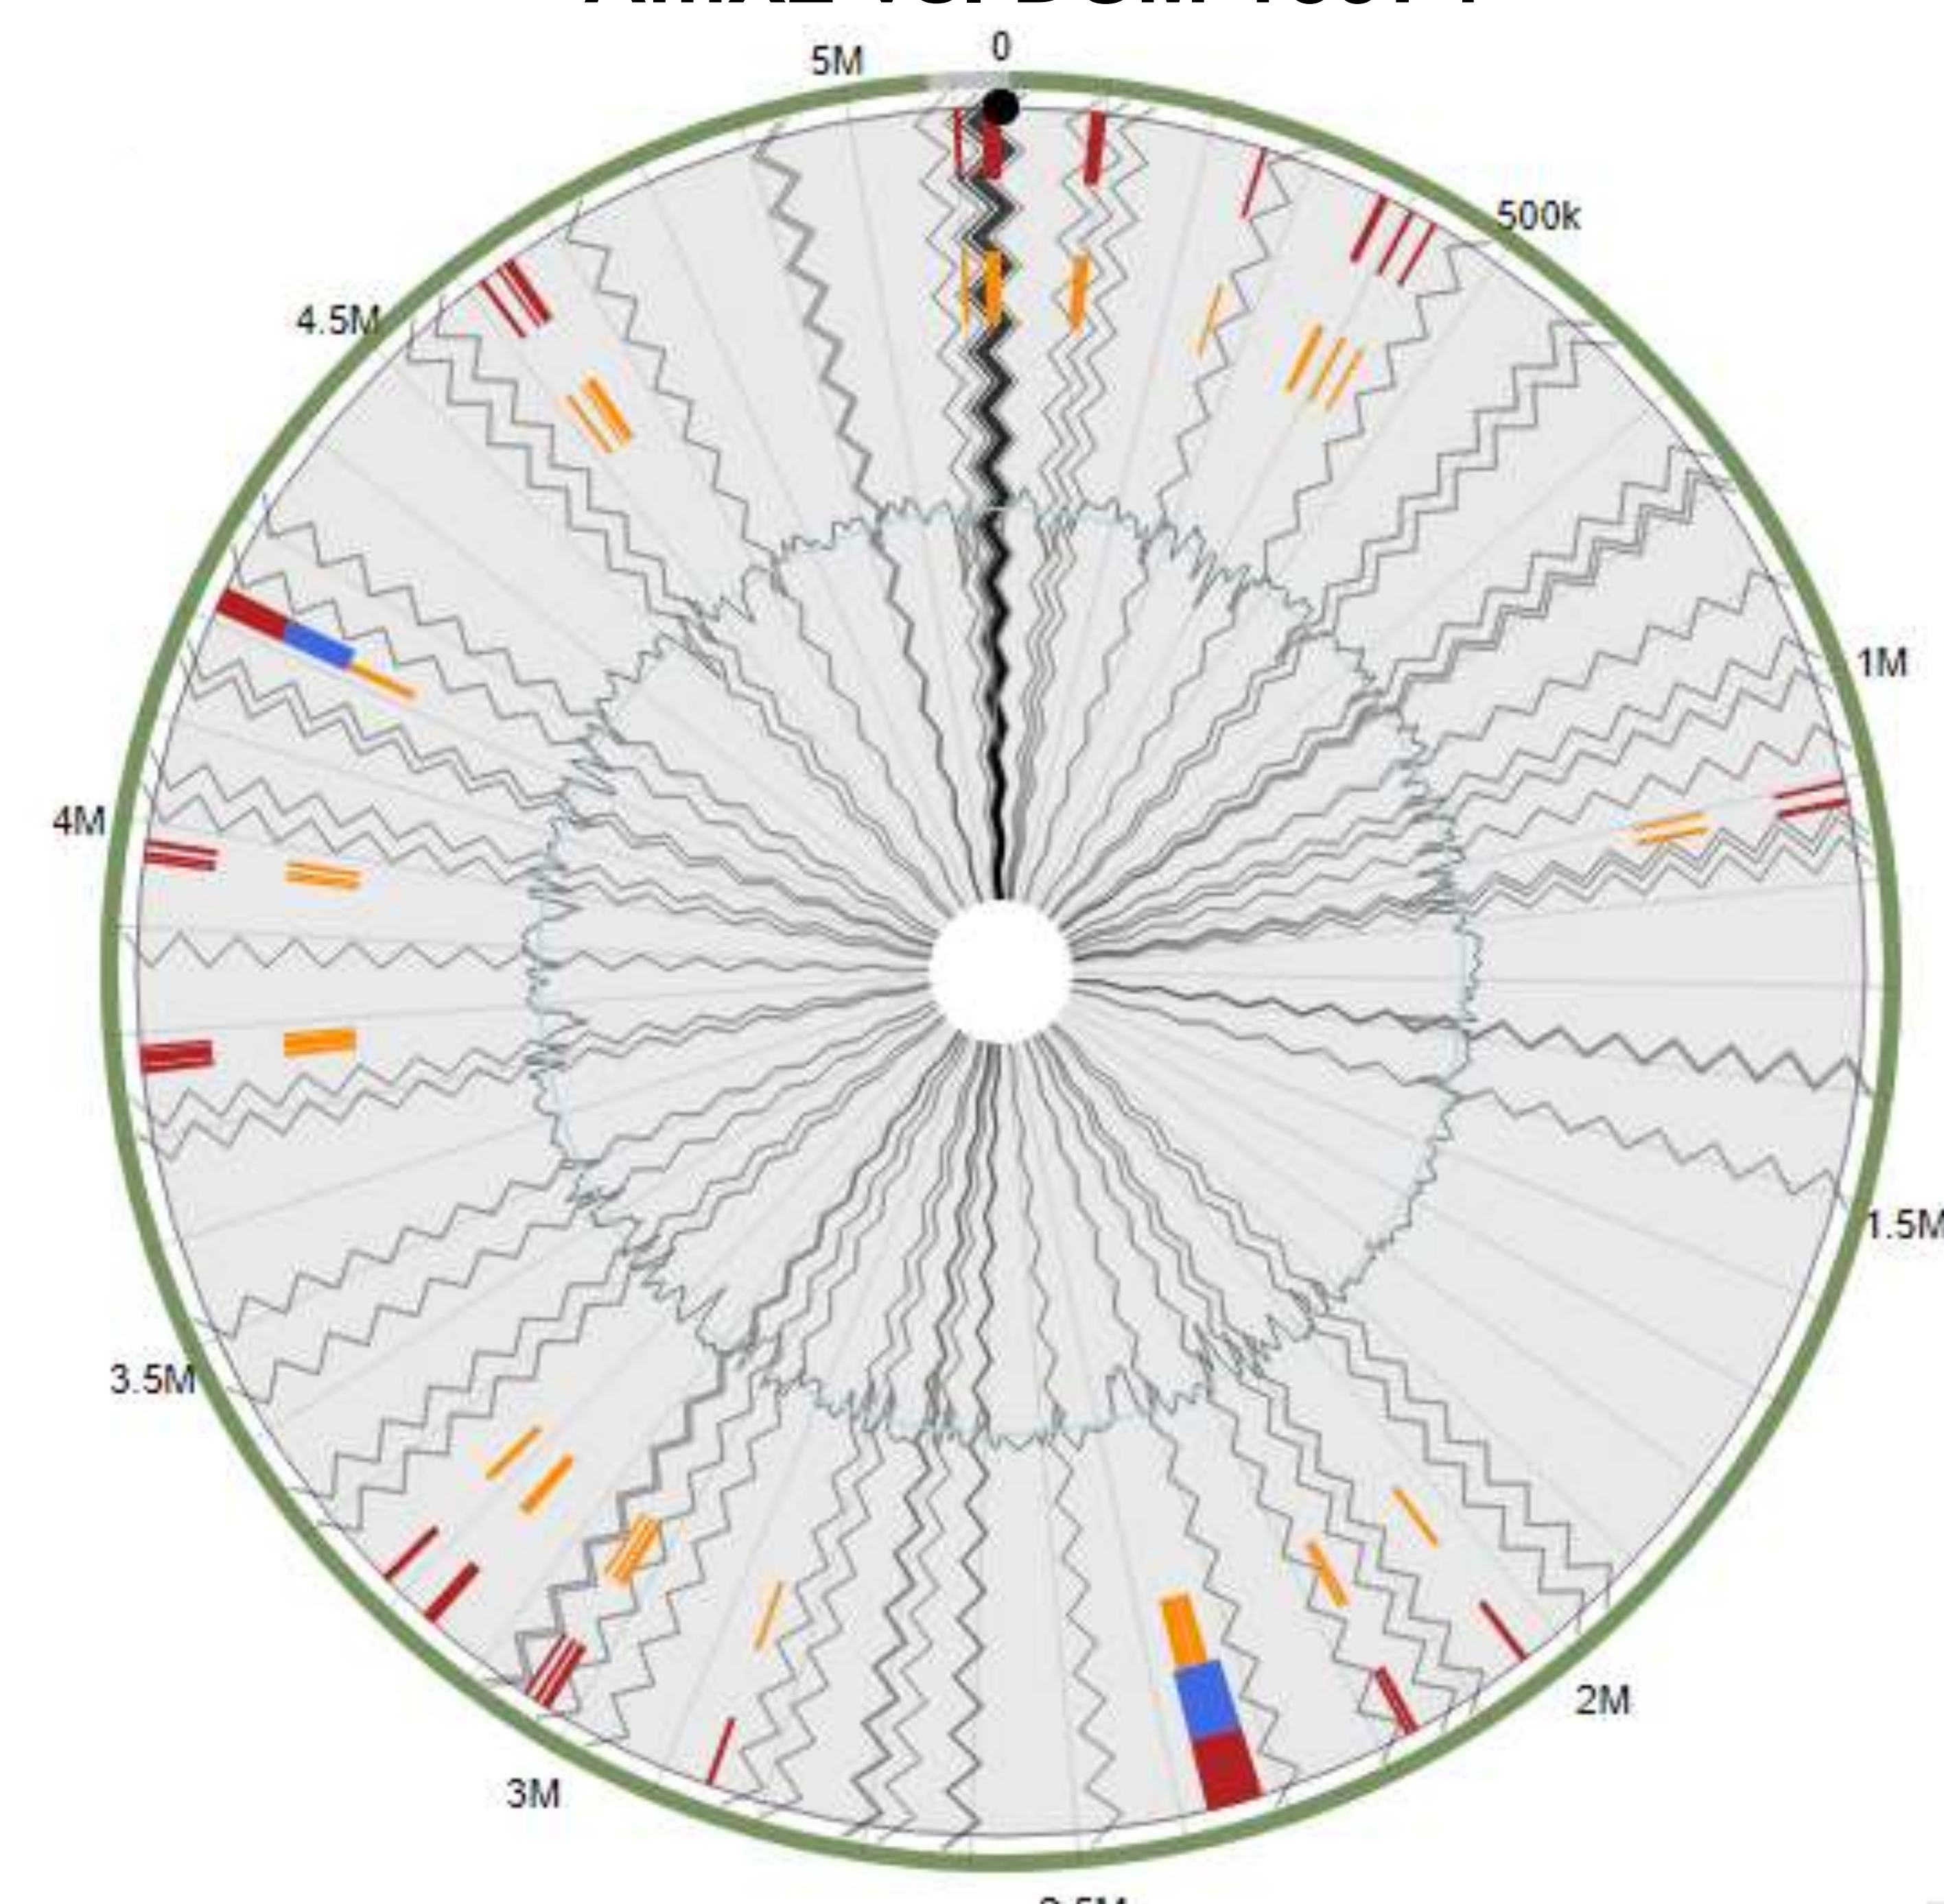

Table S1: Primer pairs used in this study.

| Prime name | 5' - 3' sequence                    | Size of amplicon | Ann. Temp. | Target species/region                               | Reference             |
|------------|-------------------------------------|------------------|------------|-----------------------------------------------------|-----------------------|
| Xc-lip-F2  | TATGTGATGGTGCCGACCATTC              | 777              | 57         | <i>Xanthomonas sp.</i>                              | Lee et al. 2009       |
| Xc-lip-R2  | GGACTTCGCGGTCCACGTCGTAGC            |                  |            |                                                     |                       |
| T1         | CCGCCATAGGGCGGAGCACCCCGAT           | 139              | 53         | <i>Xanthomonas translucens</i>                      | Maes et al. 1996      |
| T2         | GCAGGTGCGACGTTTGCAGAGGGATCTTCTGCAAA |                  |            |                                                     |                       |
| Bs-XeF     | CATGAAGAACTCGGCATATCG               | 173              | 64         | <i>X. euvesicatoria</i> pv.<br><i>euvesicatoria</i> | Koenraadt et al. 2009 |
| Bs-XeR     | GTCGGACATAGTGGACACATAC              |                  |            |                                                     |                       |
| Bs-XvF     | CCATGTGCCGTTGAAATACTTG              | 138              | 64         | <i>X. vesicatoria</i>                               | Koenraadt et al. 2009 |
| Bs-XvR     | ACAAGAGATGTTGCTATGATTTGC            |                  |            |                                                     |                       |
| Bs-XgF     | TCAGTGCTTAGTTCCTCATTGTC             | 154              | 64         | <i>X. hortorum</i> pv. <i>gardenri</i>              | Koenraadt et al. 2009 |
| Bs-XgR     | TGACCGATAAAGACTGCGAAAG              |                  |            |                                                     |                       |
| Bs-XpF     | GTCGTGTTGATGGAGCGTTC                | 197              | 64         | <i>X. euvesicatoria</i> pv.<br><i>perforans</i>     | Koenraadt et al. 2009 |
| Bs-XpR     | GTGCGAGTCAATTATCAGAATGTGG           |                  |            |                                                     |                       |
| X-gyrB1F   | ACGAGTACAACCCGGACAA                 | 904              | 57         | <i>gyrB</i>                                         | Young et al. 2008     |
| X-gyrB1R   | CCCATCARGGTGCTGAAGAT                |                  |            |                                                     |                       |
| P-X-ATPD-F | GGGCAAGATCGTTCAGAT                  | 868              | 60         | <i>atpD</i>                                         | Boudon et al. 2005    |
| P-X-ATPD-R | GCTCTTGGTCGAGGTGAT                  |                  |            |                                                     |                       |
| P-X-EFP-F  | TCATCACCGAGACCGAATA                 | 445              | 62         | <i>efp</i>                                          | Boudon et al. 2005    |
| P-X-EFP-R  | TCCTGGTTGACGAACAGC                  |                  |            |                                                     |                       |
| XtrpodF    | TGGAACAGGGCTATCTGACC                | 674              | 54         | <i>rpoD</i>                                         | Young et al. 2008     |
| XtrpodR    | CATTCYAGGTTGGTCTGRTT                |                  |            |                                                     |                       |

**A**

| Strain    | Size      | BUSCO notation assessment results |          |          |          |        |
|-----------|-----------|-----------------------------------|----------|----------|----------|--------|
| AmX2      | 5,071 kbp | C:99.8%                           | [D:17%], | F:0.09%, | M:0.09%, | n:1152 |
| FX1       | 5,387 kbp | C:99.6%                           | [D:17%], | F:0.26%, | M:0.09%, | n:1152 |
| FX4       | 5,383 kbp | C:99.9%                           | [D:17%], | F:0.0%,  | M:0.09%, | n:1152 |
| DSM 18974 | 4,715 kbp | C:99.8%                           | [D:0%],  | F:0.0%,  | M:0.17%, | n:1152 |

C: Complete; D: Duplicated; F: Fragmented; M: Missing; n: No. of genes

**B**

| <i>ooxA</i>    | AmX2 | FX1       | FX4       | <i>P. kilonensis</i> |
|----------------|------|-----------|-----------|----------------------|
| Identity       | 27.1 | 25.8      | 25.8      | 35.8 and 29.3        |
| Query coverage | 73   | 66        | 66        | 85 and 84            |
| Contig No.     | 5    | 15        | 1         | 17 and 23            |
|                |      |           |           |                      |
| <i>ooxB</i>    | AmX2 | FX1       | FX4       |                      |
| Identity       | 23.5 | 26 and 23 | 26 and 23 | 41.5 and 25.6        |
| Query coverage | 64   | 39 and 90 | 39 and 90 | 95 and 98            |
| Contig No.     | 5    | 15 and 5  | 1 and 21  | 17 and 23            |
| <i>ooxAB</i>   | AmX2 | FX1       | FX4       |                      |
| Identity       | 25   | 25        | 25        | 35.8 and 29.3        |
| Query coverage | 66   | 66        | 66        | 85 and 84            |
| Contig No.     | 1    | 15        | 1         | 17 and 23            |

**Table S2:** Quality assessment of genome assembly and annotation using BUSCO online service confirmed the accuracy and completeness of all three genomes compared to the complete genome sequence of *X. translucens* DSM 18974 (A). BLAST-based in-silico analyses using the sequences of *ooxA*, *ooxB*, and *ooxAB* genes against the three genome sequences obtained in this study revealed the presence of these genes in the three strains (B).

**Table S3:** Genomic features of the gall-associated *Xanthomonas* strains sequenced in this study in comparison to the phylogenetically closely related reference strains.

| Taxon                                         | Strain     | Host                                | Genome Information  |                   |                             |             |                     | Genome Coverage (x) | GenBank Accession Numbers |
|-----------------------------------------------|------------|-------------------------------------|---------------------|-------------------|-----------------------------|-------------|---------------------|---------------------|---------------------------|
|                                               |            |                                     | Genome length (kbp) | G + C content (%) | No. of protein-coding genes | No. of RNAs | No. of pseudo-genes |                     |                           |
| <i>Xanthomonas</i> sp.                        | FX1        | <i>Ficus benjamina</i>              | 5,387               | 68.8              | 4,502                       | 57          | 40                  | 22                  | JAFJNT000000000           |
| <i>Xanthomonas</i> sp.                        | FX4        | <i>Ficus benjamina</i>              | 5,383               | 68.8              | 4,468                       | 64          | 68                  | 115                 | JAFIWB000000000           |
| <i>Xanthomonas</i> sp.                        | AmX2       | <i>Amaranthus</i> sp.               | 5,071               | 69.8              | 4,170                       | 61          | 41                  | 124                 | JAFIWC000000000           |
| <i>X. translucens</i> pv. <i>graminis</i>     | NCPPB 3709 | Grass                               | 4,187               | 68.8              | 3,337                       | 59          | 233                 | ND                  | NZ_FLUK01000000           |
| <i>X. translucens</i> pv. <i>undulosa</i>     | ICMP 11055 | <i>Triticum aestivum</i> L.         | 4,761               | 67.8              | 3,835                       | 63          | 224                 | 118                 | CP009750                  |
| <i>X. translucens</i> pv. <i>translucens</i>  | UPB886     | <i>Hordeum vulgare</i>              | 4,674               | 67.9              | 3,681                       | 63          | 240                 | 10                  | NZ_VCIH01000000           |
| <i>X. translucens</i> pv. <i>translucens</i>  | DSM 18974  | <i>Hordeum vulgare</i>              | 4,715               | 67.7              | 3,804                       | 64          | 190                 | ND                  | LT604072                  |
| <i>X. translucens</i> pv. <i>cerealis</i>     | NCPPB 1943 | <i>Hordeum vulgare</i>              | 4,410               | 67.3              | 3,583                       | 58          | 358                 | 197                 | NZ_MADM00000000           |
| <i>X. translucens</i> pv. <i>arrhenatheri</i> | LMG 727    | <i>Arrhenatherum elatius</i>        | 4,753               | 68.3              | 3,791                       | 58          | 137                 | ND                  | NZ_CXOI00000000.1         |
| <i>X. translucens</i> pv. <i>phlei</i>        | LMG 730    | <i>Phleum pratense</i>              | 4,396               | 68.4              | 3,545                       | 58          | 212                 | ND                  | NZ_CXOJ01000000           |
| <i>X. translucens</i> pv. <i>poae</i>         | ATCC 33804 | <i>Poa trivialis</i>                | 4,498               | 67.5              | 3,789                       | 57          | 415                 | 188                 | NZ_MADN00000000           |
| <i>X. hyacinthi</i>                           | CFBP 1156  | <i>Hyacinthus orientalis</i>        | 4,918               | 68.1              | 4,011                       | 63          | 318                 | 306                 | CP043476                  |
| <i>X. translucens</i>                         |            | Sorghum ( <i>Sorghum bicolor</i> )  | 5,323               | 69.7              | 4,414                       | 60          | 52                  | 282                 | NZ_VIWM01000000           |
| <i>X. theicola</i>                            | CFBP 4691  | <i>Camellia sinensis</i>            | 4,744               | 68.4              | 3,766                       | 61          | 665                 | 264                 | CP049017                  |
| <i>Xanthomonas</i> sp.                        | NCPPB 1128 | <i>Phaseolus vulgaris</i>           | 4,950               | 68.9              | 4,133                       | 66          | 55                  | 80                  | NZ_LFME00000000           |
|                                               |            | Insect associated with banana plant | 4,898               | 69.0              | 4,168                       | 65          | 163                 | 80                  | NZ_AGDB00000000           |
| <i>X. sacchari</i>                            | NCPPB 4393 | banana plant                        |                     |                   |                             |             |                     |                     |                           |
| <i>X. albilineans</i>                         | CFBP 2523  | <i>Saccharum officinarum</i>        | 3,684               | 63.1              | 2,996                       | 81          | 168                 | 100                 | NZ_MDCB00000000           |
| <i>X. sontii</i>                              | PPL1       | <i>Oryza sativa</i>                 | 4,820               | 69.0              | 3,951                       | 58          | 198                 | 78                  | NQYO01000001              |

| Taxon                                         | Strain      | Accession number  | No. of contigs | Assembly Method                       | Annotation Method | Annotation Software revision | Annotation Method                              |
|-----------------------------------------------|-------------|-------------------|----------------|---------------------------------------|-------------------|------------------------------|------------------------------------------------|
| <i>Xanthomonas</i> sp.                        | FX1         | JAFJNT000000000   | 152            | SPAdes v. 3.12                        | NCBI              | 5.1                          | Best-placed reference protein set-GeneMarkS-2+ |
| <i>Xanthomonas</i> sp.                        | FX4         | JAFIWB000000000   | 89             | SPAdes v. 3.12                        | NCBI              | 5.1                          | Best-placed reference protein set-GeneMarkS-2+ |
| <i>Xanthomonas</i> sp.                        | AmX2        | JAFIWC000000000   | 75             | SPAdes v. 3.12                        | NCBI              | 5.1                          | Best-placed reference protein set-GeneMarkS-2+ |
| <i>X. translucens</i> pv. <i>graminis</i>     | NCP PB 3709 | NZ_FLUK01000000   | 300            | ND                                    | NCBI RefSeq       | 4.12                         | Best-placed reference protein set-GeneMarkS-2+ |
|                                               | ICMP11055   | CP009750          | 1              | HGAP3 v. SMRTAnalysis 2.2             | NCBI              | 2.8 (rev. 449627)            | Best-placed reference protein set; GeneMark-S+ |
| <i>X. translucens</i> pv. <i>undulosa</i>     | UPB886      | NZ_VCIH01000000   | 1              | HGAP v. 4                             | NCBI RefSeq       | 5.1                          | Best-placed reference protein set-GeneMarkS-2+ |
| <i>X. translucens</i> pv. <i>translucens</i>  | DSM 18974   | LT604072          | 1              | ND                                    | ND                | ND                           | ND                                             |
| <i>X. translucens</i> pv. <i>cerealis</i>     | NCP PB1943  | NZ_MADM000000000  | 251            | Velvet v. 1.0.15                      | NCBI RefSeq       | 4.12                         | Best-placed reference protein set-GeneMarkS-2+ |
| <i>X. translucens</i> pv. <i>arrhenatheri</i> | LMG 727     | NZ_CXOI00000000.1 | 89             | ND                                    | NCBI RefSeq       | 4.12                         | Best-placed reference protein set-GeneMarkS-2+ |
| <i>X. translucens</i> pv. <i>phlei</i>        | LMG730      | NZ_CXOJ01000000   | 142            | ND                                    | NCBI RefSeq       | 4.12                         | Best-placed reference protein set-GeneMarkS-2+ |
| <i>X. translucens</i> pv. <i>poae</i>         | ATCC 33804  | NZ_MADN000000000  | 674            | Velvet v. 1.0.15                      | NCBI RefSeq       | 4.12                         | Best-placed reference protein set-GeneMarkS-2+ |
| <i>X. hyacinthi</i>                           | CFBP 1156   | CP043476          | 1              | HGAP v. 4.0                           | NCBI RefSeq       | 4.9                          | Best-placed reference protein set-GeneMarkS-2+ |
| <i>X. translucens</i>                         | 569         | NZ_VIWM01000000   | 16             | SPAdes v. 3.13.0                      | NCBI RefSeq       | 4.12                         | Best-placed reference protein set-GeneMarkS-2+ |
| <i>X. theicola</i>                            | CFBP 4691   | CP049017          | 435            | HGAP v. 4.0                           | NCBI RefSeq       | 4.11                         | Best-placed reference protein set-GeneMarkS-2+ |
| <i>Xanthomonas</i> sp.                        | NCP PB1128  | NZ_LFME000000000  | 71             | SPAdes v. 3.5.0                       | NCBI RefSeq       | 5.1                          | Best-placed reference protein set-GeneMarkS-2+ |
| <i>X. sacchari</i>                            | NCP PB 4393 | NZ_AGDB000000000  | 470            | Velvet v. 1.1.03                      | NCBI RefSeq       | 5.0                          | Best-placed reference protein set-GeneMarkS-2+ |
| <i>X. albilineans</i>                         | CFBP2523    | NZ_MDCB000000000  | 148            | Velvet v. 1.2.07;                     | NCBI RefSeq       | 4.11                         | Best-placed reference protein set-GeneMarkS-2+ |
| <i>X. sontii</i>                              | PPL1        | NQYO01000001      | 332            | CLC NGS Cell v. 10                    | NCBI RefSeq       | 4.2                          | Best-placed reference protein set-GeneMarkS-2+ |
|                                               | PXO99A      | NC_010717         | 1              | Celera Assembler v. 7.0; SVN revision | NCBI RefSeq       | 5.0                          | Best-placed reference protein set-GeneMarkS-2+ |

ND: Not determined

**Table S4:** Assembly and annotation information for the genome sequences of *Xanthomonas* strains used in this study.

**Table S5:** In silico screening for bacteriocins and antibiotic peptides among the clade-I xanthomonad genome sequences analyzed in this study.

| <b>Taxon</b>                                  | <b>Strain</b> | <b>Start codon</b> | <b>End codon</b> | <b>gene ID</b> | <b>Class</b>           |
|-----------------------------------------------|---------------|--------------------|------------------|----------------|------------------------|
| <i>Xanthomonas</i> sp.                        | FX1           | 29117              | 49117            | SU2U6DHN013    | Sactipeptides          |
|                                               |               | 4098               | 24404            | SU2RDK4F016    | Zoocin_A               |
| <i>Xanthomonas</i> sp.                        | FX4           | 272837             | 293143           | SU316SGK013    | Zoocin_A               |
| <i>Xanthomonas</i> sp.                        | AmX2          | 1                  | 16792            | SU25J9VB013    | Zoocin_A               |
|                                               |               | 59555              | 79909            | SU2CS5MN013    | Rhodanodin             |
| <i>X. translucens</i> pv. <i>graminis</i>     | NCP PB 3709   | 6493               | 13507            | SU3F4TS1016    | Sactipeptides          |
|                                               |               | 1                  | 14668            | SU3FU8EM013    | Zoocin_A               |
| <i>X. translucens</i> pv. <i>undulosa</i>     | ICMP 11055    | 3175859            | 3196165          | SU3S1T6U016    | Zoocin_A               |
| <i>X. translucens</i> pv. <i>translucens</i>  | UPB886        | 1556565            | 1576871          | SU3WH7RE016    | Zoocin_A               |
| <i>X. translucens</i> pv. <i>translucens</i>  | DSM 18974     | 2853584            | 2873890          | SU8PDA47013    | Zoocin_A               |
| <i>X. translucens</i> pv. <i>cerealis</i>     | NCP PB 1943   | 14585              | 34870            | SU4ACKR701R    | Zoocin_A               |
|                                               |               | 428                | 20428            | SU497DWS01R    | Sactipeptides          |
| <i>X. translucens</i> pv. <i>arrhenatheri</i> | LMG 727       | 15980              | 36286            | SU4ACKR701R    | Zoocin_A               |
|                                               |               | 71606              | 91606            | SU4ACKR701R    | Sactipeptides          |
| <i>X. translucens</i> pv. <i>poae</i>         | ATCC 33804    | -6589              | 13411            | SU5MG31H013    | Sactipeptides          |
|                                               |               | 1522               | 18478            | SU5PF8HV01R    | Microcin               |
|                                               |               | 0                  | 7536             | SU5PF8HV01R    | Zoocin_A               |
|                                               |               | 3934               | 16066            | SU5PF8HV01R    | Sactipeptides          |
| <i>X. hyacinthi</i>                           | CFBP 1156     | 3858063            | 3878369          | SU5WTNE1013    | Zoocin_A               |
| <i>X. translucens</i>                         | 569           | 378461             | 398767           | SU61CZRB013    | Zoocin_A               |
| <i>X. theicola</i>                            | CFBP 4691     | 35588              | 55588            | SU6F10G2016    | Sactipeptides          |
| <i>Xanthomonas</i> sp.                        | NCP PB 1128   | 8891               | 28891            | SU6S1F3901R    | Sactipeptides          |
|                                               |               | 464                | 20770            | SU6TKGCX013    | Zoocin_A               |
|                                               |               | 8197               | 11803            | SU6TKGCX013    | Sactipeptides          |
| <i>X. sacchari</i>                            | NCP PB 4393   | 0                  | 14755            | SU7CFRHR016    | Zoocin_A               |
|                                               |               | 6854               | 26854            | SU7DUS55013    | Sactipeptides          |
| <i>X. albilineans</i>                         | CFBP 2523     | 70001              | 90307            | SU7DUS55013    | Zoocin_A               |
|                                               |               | 269267             | 289267           | SU7VAXPR01R    | Lanthipeptide_class_IV |
|                                               |               | 303776             | 323776           | SU8H1X8S013    | Microcin               |



**Table S6:** Prophages within the genome sequences of clade-I xanthomonad strains detected using the online service PHASTER.

| Taxon                                         | Strain     | Region Length (Kb) | Completeness | Total Protein | gene ID     | Most Common Phage                            | GC % |
|-----------------------------------------------|------------|--------------------|--------------|---------------|-------------|----------------------------------------------|------|
| <i>Xanthomonas</i> sp.                        | FX1        | 12.8               | incomplete   | 12            | SXHAS80N013 | Escherichia phage 500465-1; NC_049342        | 68.9 |
| <i>Xanthomonas</i> sp.                        | FX4        | 12.8               | incomplete   | 12            | SXHRWEJF01R | Escherichia phage 500465-1; NC_049342        | 68.9 |
| <i>Xanthomonas</i> sp.                        | AmX2       | 11                 | incomplete   | 10            | SXGGHMWK016 | Escherichia phage 500465-1; NC_049342        | 69.8 |
|                                               |            | 0.7                | incomplete   | 11            | SXGB4WXJ013 | Ralstonia phage phiRSA1; NC_009382           | 63.7 |
| <i>X. translucens</i> pv. <i>graminis</i>     | NCPPB 3709 | 6.2                | incomplete   | 8             | SXJ587H6013 | Escherichia phage 500465-1; NC_049342        | 68.9 |
| <i>X. translucens</i> pv. <i>undulosa</i>     | ICMP 11055 | 24.5               | questionable | 14            | SXJFM2NJ016 | Ralstonia phage phiRSA1; NC_009382           | 63.9 |
|                                               |            | 33.7               | intact       | 15            | SXJED8BV013 | Shigella phage SfIV; NC_022749               | 65.0 |
|                                               |            | 13.5               | incomplete   | 8             | SXJBD8KU013 | Stenotrophomonas phage phiSMA6 ; NC_043029   | 66.3 |
|                                               |            | 44.5               | intact       | 67            | SXJ9R7KG013 | Pseudomonas phage phiPSA1; NC_024365         | 67.2 |
| <i>X. translucens</i> pv. <i>translucens</i>  | UPB886     | 12.3               | incomplete   | 10            | SXJP44SE013 | Paenibacillus phage Tripp; NC_028930         | 65.0 |
|                                               |            | 9.1                | incomplete   | 8             | SXJRK8B016  | Synechococcus phage ACG-2014f; NC_047714     | 65.3 |
|                                               |            | 10.6               | questionable | 10            | SXJT2AG6013 | Listeria phage LMTA-34; NC_042048            | 66.6 |
| <i>X. translucens</i> pv. <i>translucens</i>  | DSM 18974  | 12.3               | incomplete   | 10            | SXK3D14E013 | Paenibacillus phage Tripp; NC_028930         | 65.0 |
| <i>X. translucens</i> pv. <i>cerealis</i>     | NCPPB 1943 | 6.1                | incomplete   | 7             | SXK72C59016 | Agrobacterium phage Atu_ph07; NC_042013      | 63.2 |
| <i>X. translucens</i> pv. <i>arrhenatheri</i> | LMG 727    | 9.3                | incomplete   | 9             | SXKGYC2N013 | Escherichia phage 500465-1; NC_049342        | 69.1 |
| <i>X. translucens</i> pv. <i>phlei</i>        | LMG 730    | 5.2                | questionable | 6             | SXKKGADM016 | Coliphage phi-X174; NC_001422                | 44.8 |
| <i>X. translucens</i> pv. <i>poae</i>         | ATCC 33804 | 7.3                | incomplete   | 7             | SXKXT95Y013 | Escherichia phage PA28; NC_041935            | 67.0 |
| <i>X. hyacinthi</i>                           | CFBP 1156  | 11.7               | incomplete   | 11            | SXM3AX8A013 | Escherichia phage 500465-1_NC_049342(6)      | 68.9 |
| <i>X. translucens</i>                         | 569        | 12.7               | incomplete   | 13            | SXMMNTAM013 | Escherichia phage 500465-1_NC_049342(6)      | 69.6 |
| <i>X. theicola</i>                            | CFBP 4691  | 4.4                | incomplete   | 6             | SXNNYR3W016 | Synechococcus phage ACG-2014f; NC_047712     | 67.2 |
|                                               |            | 24.5               | intact       | 27            | SXNTYE2H013 | Xanthomonas phage Xp15; NC_007024            | 66.6 |
| <i>Xanthomonas</i> sp.                        | NCPPB 1128 | 88.3               | intact       | 111           | SXPH7FS9013 | Xylella phage Xfas53; NC_013599              | 67.8 |
| <i>X. sacchari</i>                            | NCPPB 4393 | 7.6                | intact       | 14            | SXPMZ2W4013 | Stenotrophomonas phage PSH1; NC_010429       | 62.4 |
| <i>X. albilineans</i>                         | CFBP 2523  | 5.2                | incomplete   | 9             | SXR4BE1F013 | Shigella phage SfIV; NC_022749               | 61.6 |
|                                               |            | 9.6                | incomplete   | 12            | SXR6S4D4013 | Escherichia phage 500465-1_NC_049342         | 63.2 |
|                                               |            | 21.9               | intact       | 27            | SXR8XRZC013 | Salmonella phage 118970_sal3; NC_031940      | 61.8 |
|                                               |            | 6.7                | incomplete   | 8             | SXRDR02G013 | Proteus phage Mydo; NC_048741                | 63.8 |
|                                               |            | 7.9                | intact       | 15            | SXRG3EEA013 | Stenotrophomonas phage phiSMA6 ; NC_043029   | 57.8 |
|                                               |            | 8.5                | questionable | 18            | SXRMUVS5016 | Stx2-converting phage Stx2a_WGPS9; NC_049923 | 59.0 |

**Reference for supplementary material:**

- Boudon, S., Manceau, C., & Nottéghem, J. L. (2005). Structure and origin of *Xanthomonas arboricola* pv. *pruni* populations causing bacterial spot of stone fruit trees in Western Europe. *Journal of Phytopathology*, 95(9), 1081-1088.
- Koenraadt H, van Betteray B, Germain R, Hiddink G, Jones JB, Oosterhof J, 2009. Development of specific primers for the molecular detection of bacterial spot of pepper and tomato. In: Aysan Y, Saygili H, Sahin F, Proceedings of the second International Symposium on Tomato Diseases. October 8, 2007, Kusadasi, Turkey. International Society for Horticultural Science, *Acta Horticulturae*, 808, 99–102.
- Lee YA, Sung AN, Liu TF, Lee YS (2009) Combination of chromogenic differential medium and estA-specific PCR for isolation and detection of phytopathogenic *Xanthomonas* spp. *Appl Environ Microbiol* 75: 6831-6838
- Maes M, Garbeva P, Kamoen O. 1996. Recognition and detection in seed of the *Xanthomonas* pathogens that cause cereal leaf streak using rDNA spacer sequences and polymerase chain reaction. *Phytopathology* 86:63-69.
- Young, J. M., Park, D. C., Shearman, H. M., & Fargier, E. (2008). A multilocus sequence analysis of the genus *Xanthomonas*. *Systematic and applied microbiology*, 31(5), 366-377.
